# A dynamic neural resource model bridges sensory and working memory

Ivan Tomić<sup>1,2,\*</sup> & Paul M. Bays<sup>1</sup>

<sup>1</sup>University of Cambridge, Department of Psychology, Cambridge, UK

<sup>2</sup>University of Zagreb, Department of Psychology, Zagreb, CRO

\*corresponding author: [ivn.tomic@gmail.com](mailto:ivn.tomic@gmail.com)

## Abstract

Probing memory of a complex visual image within a few hundred milliseconds after its disappearance reveals significantly greater fidelity of recall than if the probe is delayed by as little as a second. Classically interpreted, the former taps into a detailed but rapidly decaying visual sensory or “iconic” memory (IM), while the latter relies on capacity-limited but comparatively stable visual working memory (VWM). While iconic decay and VWM capacity have been extensively studied independently, currently no single framework quantitatively accounts for the dynamics of memory fidelity over these timescales. Here we extend a stationary neural population model of VWM with a temporal dimension, incorporating rapid sensory-driven accumulation of activity encoding each visual feature in memory, and a slower accumulation of internal error that causes memorized features to randomly drift over time. Instead of facilitating read-out from an independent sensory store, an early cue benefits recall by lifting the effective limit on VWM signal strength imposed when multiple items compete for representation, allowing memory for the cued item to be supplemented with information from the decaying sensory trace. Empirical measurements of human recall dynamics validate these predictions while excluding alternative model architectures.

**Keywords:** short-term memory, population coding, temporal dynamics, delay, encoding, decoding

## Significance

The need to make sense of and interact with the world often requires us to keep information from our senses in mind for short periods of time. This ability is constrained by how quickly the brain can incorporate new sensory information into short-term memory, the limited capacity of that memory and the rate at which memories deteriorate. Here we propose a new mechanistic account, based on principles of neural coding, that unifies processes of encoding, sensory and working memory in a comprehensive framework that captures temporal dynamics in the fidelity of human short-term recall. A key conclusion is that sensory information cannot contribute directly to a cognitive judgment, but must first be integrated into resource-limited working memory.

## 1 Introduction

2 Keeping relevant information in an easily accessible state is vital for adaptive behavior in dynamic en-  
3 vironments. In the primate visual system, this requirement is met by visual working memory (VWM),  
4 the capacity to actively maintain visual information from milliseconds to seconds after a stimulus dis-  
5 appears from view [1–4]. While the contents of VWM are frequently updated to reflect changes in the  
6 environment and in behavioral priorities, the visual processing hierarchy itself introduces additional  
7 layers of dynamism [5, 6]. The fidelity of representations therefore evolves from the moment VWM  
8 starts accumulating evidence [7, 8] throughout the maintenance period until the information is used  
9 for action [9–11].

10  
11 Nonetheless, within most theoretical frameworks, VWM is treated as a stationary process whereby  
12 representations are measured and modeled as fixed states of the system. One such model of working  
13 memory is based on principles of neural population coding [12, 13]. In the Neural Resource model,  
14 visual information is encoded in the activity of a population of noisy feature-selective neurons [14, 15].  
15 The spiking activity of the neural population is constrained by normalization [16], such that the total  
16 activity is fixed but flexibly distributed between memoranda, implementing a form of limited mem-  
17 ory resource. At retrieval, encoded stimulus values are reconstructed from the noisy spiking activity.  
18 This model has provided a quantitative account of patterns of recall error across a range of tasks and  
19 stimulus dimensions [17–20]. However, despite its grounding in principles of neural coding, the basic  
20 architecture of the model lacks a temporal dimension to describe the dynamics of memory represen-  
21 tations during encoding and maintenance.

22  
23 Research on prolonged memory maintenance has demonstrated that the precision of stored rep-  
24 resentations gradually deteriorates over time (e.g., 21, 22). Computational models attempting to  
25 account for these dynamics have often relied on principles of diffusion within an attractor network.  
26 In such a network, information is maintained in a sustained pattern of activity, which can be visu-  
27 alized as a “bump” of activity centered on the stored value. Over time, the bump diffuses along the  
28 feature dimension due to random fluctuations in neural activity, leading to stochastic changes in the  
29 encoded feature value and a gradual loss of information [23, 24]. Critically, the neural code diffuses  
30 without decay in signal strength. A growing body of empirical support, both at the behavioral [9]  
31 and neural level [25, 26], identifies diffusion as a key mechanism of memory deterioration.

32  
33 In contrast to such gradual deterioration over longer retention intervals, studies that probed mem-  
34 ory within a few hundred milliseconds of stimulus offset revealed a precipitous decrease in memory  
35 fidelity immediately after a stimulus disappears [27–30]. This early superior recall was attributed  
36 to a high-capacity but short-lived form of storage termed iconic memory (IM) [31]. The behavioral  
37 advantage of early cues has been ascribed to reading out information directly from IM and circum-  
38 venting capacity limitations imposed by VWM, however, this idea has not been formally modelled  
39 or tested. At the neural level, IM is thought to be supported by a brief period of decaying neural  
40 activity in early visual areas following the response elicited by the visible stimulus [32–34]. In contrast  
41 to later memory dynamics arising due to noise accumulation, early changes in memory fidelity were  
42 supported by modulation of the neural signal strength. However, little is known about the read-out  
43 of this sensory memory buffer.

44  
45 Finally, memory fidelity changes during encoding while the evidence is extracted from the visible  
46 stimulus. Previous studies revealed that longer stimulus exposures have a favorable effect on the  
47 subsequent recall, but that this effect is modulated by the number of simultaneously encoded objects  
48 [35–37], providing evidence for a processing or encoding limitation of VWM. As stimulus presen-  
49 tation duration increases, more information may be extracted from the sensory signal into VWM,  
50 increasing the fidelity of the representation. Critically, with prolonged exposure, VWM fidelity ap-  
51 proaches a stable level that depends on the number of encoded items, suggesting that a ceiling is  
52 imposed on evidence accumulation by a shared limit on VWM resources. However, a computational  
53 framework describing information accumulation from sensory areas into VWM is lacking, and the  
54 observed encoding limit may reflect dynamics in sensory areas registering visible objects as well as  
55 VWM accumulating this sensory evidence.

56  
57 Here, we investigated the temporal dynamics in the fidelity of VWM from information encoding

58 until its recall. To map human recall fidelity to the time domain, we conducted psychophysical exper-  
59 iments in which we probed memory representations at different time points relative to stimulus onset  
60 and offset while simultaneously manipulating set size. To isolate memory dynamics due to changes in  
61 the representational signal, we advanced an analogue reproduction task with a novel response method  
62 specifically adapted to minimize the time cost of motor (i.e., response) processes and capture the mo-  
63 mentary state of memory representations. This allowed us to precisely measure the time course of  
64 fidelity dynamics during representation formation (i.e., encoding) and retention (i.e., maintenance).  
65 A major conclusion is that the enhanced precision seen at very brief retention intervals depends on  
66 integration of information from the sensory store into VWM following the cue, with direct read-out  
67 from IM unable to account for the empirical patterns of results.  
68

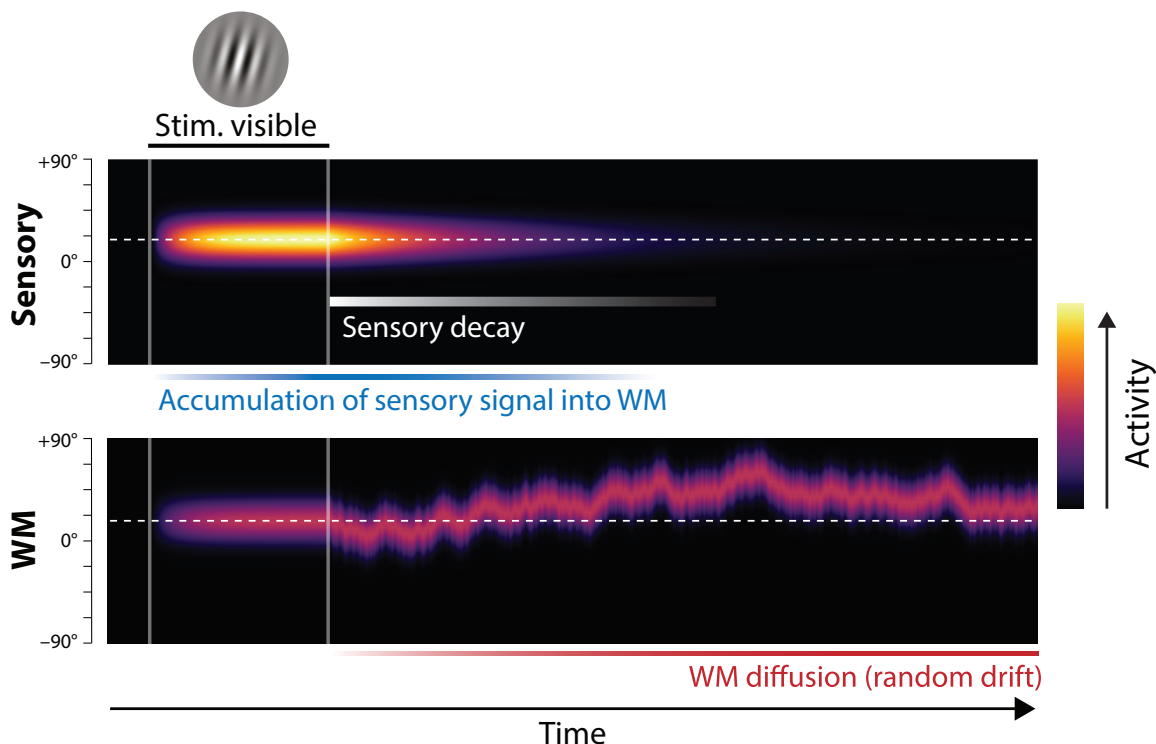

Figure 1: Proposed neural population dynamics for encoding a single orientation into VWM and maintaining it over a delay. Top: Stimulus onset is followed by a ramping increase in activity (indicated by color) of sensory neurons whose tuning (indicated on y axis) matches the stimulus orientation. Following stimulus offset, this sensory signal rapidly decays. The sensory signal, including its decaying post-stimulus component, provides input into VWM. Bottom: At stimulus onset, the VWM population begins to accumulate activity from the sensory population. This accumulation saturates at a maximum amplitude determined by global normalization. As the sensory activity decays, the activity in the VWM population is maintained at a constant amplitude, but accumulation of random errors causes the activity bump to diffuse along the feature dimension (y axis) over time, changing the orientation represented by the population. At recall, when the VWM population activity is decoded, accuracy of the recall estimate depends on both the orientation represented (centre of the activity bump) and the fidelity with which it can be retrieved (determined by activity amplitude).

69 To explain the neural computations underlying the observed time courses, we devised a compre-  
70 hensive neural model of memory dynamics whose core architecture is rooted in the Neural Resource  
71 model of VWM [12, 13]. The Dynamic Neural Resource (DyNR) model assumes that changes in  
72 memory fidelity reflect temporal dynamics in the sensory population registering the stimuli and from  
73 signal and noise accumulation processes of resource-limited VWM (Fig. 1). In particular, the model  
74 prescribes how time-dependent gain control mechanisms in sensory areas produce a smooth neural  
75 response following abrupt changes in stimulus presence. As this sensory signal provides feed-forward  
76 input to VWM, the dynamics in VWM activity in the temporal vicinity of stimulus presentation  
77 (i.e., onset and offset) strongly reflect not only limits in VWM, but also the dynamics of the sensory

78 signal. Finally, once accumulated into VWM, the neural signal is subject to perturbations due to  
79 noise accumulation, resulting in degradation of internal representations with time. The DyNR model  
80 accurately reproduced the detailed empirical patterns of human recall errors in the psychophysical  
81 experiments. Based on these results, we argue that changes in memory fidelity on short time scales  
82 reflect dynamics in the gain or signal strength in neural populations representing the stimulus, while  
83 changes on longer time scales are dominated by corruption of the representation by accumulated  
84 noise.

## 85 Dynamic Neural Resource (DyNR) Model

86 The Dynamic Neural Resource model generalizes an established neural population account of VWM,  
87 originally proposed by Bays [12] and inspired by similar models of attention and perceptual decision-  
88 making [38, 39]. In the original model, memorization and recall of visual stimuli is achieved by  
89 encoding and decoding of spiking activity in idealized feature-tuned neurons. The limited capacity of  
90 VWM to hold multiple object features simultaneously is reproduced by a global divisive normaliza-  
91 tion that constrains total spiking activity, implementing a continuous memory resource [16, 12]. The  
92 DyNR model (illustrated in Fig. 1) extends this stationary encoding-decoding model with a temporal  
93 dimension. First, to capture encoding dynamics, stimulus information enters the VWM population  
94 (Fig. 1, bottom) indirectly, by accumulation of neural signal from a separate sensory population (top),  
95 which receives the visual input. The signal strength in the VWM population at any point in time  
96 jointly depends on the history of the signal in the sensory population and the number of features com-  
97 peting for representation in VWM. Once the sensory signal is gone, the VWM signal is maintained  
98 at its maximum attained amplitude, but the stimulus value encoded by the signal gradually diffuses  
99 due to accumulation of random noise. Recall error depends on both the stimulus value represented  
100 at the time of retrieval (*what* is encoded) and the signal amplitude at that time, read out in the form  
101 of spikes (*how precisely* it can be decoded).

### 103 Dynamics of sensory signal strength

104 To model the temporal dynamics of human memory fidelity, we begin by defining computations of the  
105 sensory system registering the incoming signal. A particularly important computation is temporal  
106 filtering – a property of neurons to respond more sensitively to specific temporal patterns in stimuli.  
107 To model the signal represented in the cortical sensory level, we assume that the sensory response  
108 to a stimulus presentation of fixed duration (described as a step function in visual input amplitude,  
109 Fig. 2A & B, left) is controlled by a monophasic temporal filter having a low-pass frequency response  
110 [40]. This choice is a natural one since it is consistent with electrophysiological studies demonstrating  
111 that a large range of temporal frequencies registered by the retina and LGN [41, 42] is attenuated  
112 at higher frequencies before the signal enters the primary visual cortex [43]. Passing the stimulus  
113 through such a temporal filter attenuates the neural response to fast transients in the signal, and  
114 thereby produces a smooth rise and decay of neural activity in response to a uniform input signal  
115 (Fig. 2C). In particular, we assume that the activity of the sensory population after stimuli onset and  
116 offset changes exponentially towards the maximum sensory activity and baseline activity, respectively.

117  
118 The choice of the filter’s temporal response characteristics (i.e., its time constant) fully defines  
119 dynamics in the sensory population activity and controls the signal projected towards higher areas.  
120 The available physiological evidence suggests the temporal properties of the rising and decaying neural  
121 response are not symmetric [44, 45]. In particular, the neural response typically reaches the maximum  
122 activity after the onset faster than it reaches the baseline activity after the offset. Consistent with  
123 this, we allowed the sensory signal to decay at a different rate than the rising rate. The temporal  
124 dynamics in sensory population firing activity in response to a fixed input signal of duration  $t_{\text{offset}}$  is  
125 then given by:

$$\hat{\gamma}_s(t) = \begin{cases} (\tilde{\gamma}_s - \gamma_s(t))/\tau_{\text{rise}} & \text{for } t \leq t_{\text{offset}} \\ -\gamma_s(t)/\tau_{\text{decay}} & \text{for } t > t_{\text{offset}} \end{cases} \quad (1)$$

126 where  $\tilde{\gamma}_s$  is the maximum sensory signal,  $\tau_{\text{rise}}$  and  $\tau_{\text{decay}}$  are rising and decaying time constants of  
127 the temporal filter, respectively.

128

129 The temporal properties of the sensory response have been shown to depend on the physical char-  
130 aracteristics of stimuli, such as contrast and location [44, 46]. Similarly, previous work has demonstrated  
131 that the decaying component of the sensory response is strongly influenced by the engagement of the  
132 sensory population after stimuli offset (e.g., 32). In particular, a new input signal, e.g. a backward  
133 noise mask, curtails ongoing activity related to the previous stimulus, resulting in a faster decay of  
134 activity compared to the unmasked post-stimulus period [47]. Consistent with this, here we assume  
135 that the backward mask operates by interrupting ongoing sensory processing of stimuli, limiting the  
136 access to the sensory signal (cf. integration mask) [48].

## 137 Dynamics of VWM signal strength

138 The information registered by the sensory system is subsequently accumulated into a VWM pop-  
139 ulation capable of maintaining activity in the absence of further input (e.g. by self-excitation, see  
140 49, 50, 24; although only the resulting dynamics are modelled here). The total activity of the VWM  
141 neural population is normalized, implementing a limited resource shared out between memory items  
142 [12, 13]. Consequently, if the stimuli are presented for long enough, the evidence accumulated from the  
143 sensory signal into VWM will saturate at a level that reflects the total number of stimuli represented  
144 (Fig. 2D). The dynamics in VWM population activity are given by:

$$\dot{\gamma}_{\text{wm}}(t) = \gamma_{\text{s}}(t)(\check{\gamma}_{\text{wm}}/M(t) - \gamma_{\text{wm}}(t))/\tau_{\text{wm}} \quad (2)$$

145 where  $\check{\gamma}_{\text{wm}}$  is the maximum VWM signal amplitude,  $M(t)$  is the number of items represented in  
146 VWM at time  $t$ ,  $\tau_{\text{wm}}$  is the time constant of accumulation into VWM.

147  
148 A common assumption of VWM models is that the strength of the representational signal remains  
149 stable after encoding from a visible stimulus. This stationary view has been reinforced by typically  
150 measuring VWM sufficiently long after the stimulus disappears ( $\sim 1$  second) and at a single time-  
151 point. In contrast, work on IM demonstrated that recall fidelity in a brief period after stimulus offset  
152 typically surpasses and then precipitously decays towards VWM fidelity level [51]. Consistent with  
153 that, we consider how the normalized representational signal in VWM formed during encoding can be  
154 boosted in the absence of the physical stimulus. In particular, we assume a representation stored in  
155 VWM can be strengthened as long as the sensory population provides feed-forward input and VWM  
156 activity is not saturated at the normalized level. Such a scenario can be achieved by cueing an item  
157 for recall in the temporal vicinity of stimulus offset, i.e. before sensory activity decays to zero. By  
158 cueing an item for recall, the remaining contents of VWM becomes obsolete and can be removed from  
159 memory [52]. In the model,

$$M(t) = \begin{cases} N & \text{for } t \leq t_{\text{cue}^*} \\ 1 & \text{for } t > t_{\text{cue}^*} \end{cases} \quad (3)$$

160 where  $t_{\text{cue}^*}$  is the time when the item is identified for a recall and the readout of stimulus value begins.  
161 This “demounting” of resource from uncued items makes it available for storing additional informa-  
162 tion about the cued item, which is extracted from the residual sensory representation, increasing  
163 the representation fidelity beyond that granted by equal distribution of neural signal between items.  
164 Critically, as sensory information quickly decays, there will be less signal remaining to supplement  
165 the VWM representation of a cued item if the cue is delivered later, and at the longest cue intervals  
166 the cue will confer no advantage over the fidelity attained when all items compete equally for VWM  
167 representation (Fig. 2D).

168  
169 We note that removal of uncued items cannot occur until the cue has been processed to the point  
170 of identifying one of the  $N$  items in the memory array. We follow Hick [53] in modelling this cue  
171 processing time as logarithmic in the number of alternatives:

$$t_{\text{cue}^*} = t_{\text{cue}} + b \log_2(N) \quad (4)$$

172 where  $b$  is a scaling parameter. Previous work demonstrated that estimation of temporal dynamics  
173 in attention and memory could be confounded with the time needed to interpret the cue and start  
174 acting on it [54]. This is especially significant when trying to accurately capture quickly changing  
175 processes, such as decay of the sensory residual. Although the cue processing time likely fluctuates  
176 on a trial-by-trial basis due to changes in, e.g. attention, arousal, or motivation, here we focus on the  
177 influence of set size arising from a limited information processing capacity.

178

## 179 Diffusion of VWM encoded values

So far we have described only changes in the strength of the neural signal encoding features in memory. However, feature representations maintained over time in neural activity will accumulate noise in the absence of external input. We model this process of noise-driven diffusion as Brownian motion in feature space throughout the retention interval (Fig. 1), contributing to variability in the decoded feature value [23, 9]. The resulting variability is described by a wrapped normal distribution with variance  $\sigma^2$  that increases linearly with time from stimulus offset, so that at time  $t$  the encoded feature corresponding to a true stimulus feature  $\theta$  is

$$\theta(t) \sim \mathcal{WN}(\theta, \sigma^2(t)) \quad (5)$$

$$\sigma^2(t) = (t - t_{\text{offset}})\sigma_{\text{diff}}^2 \quad (6)$$

180 where  $\sigma_{\text{diff}}^2$  specifies the base diffusion rate. While the fast decay of sensory activity after stimuli  
181 offset accounts for early dynamics in VWM fidelity, diffusion becomes prominent over longer delays,  
182 accounting for more gradual deterioration of precision with time.

183

184 Such a diffusion account has support in the available neural evidence as well as in theoretical work.  
185 At the neural level, an electrophysiological study in monkeys performing a spatial working memory  
186 task demonstrated that shifts of neural tuning curves during a memory delay predicted behavioral  
187 response errors [24]. A similar finding was observed in humans where drift in the fMRI activity pat-  
188 terns relative to the target predicted errors in an orientation discrimination task [25]. At a theoretical  
189 level, continuous attractor models explain diffusion as a consequence of neural variability in networks  
190 where excitatory and inhibitory connections constrain population activity to a sub-space or manifold  
191 corresponding to the encoded feature space [23, 55, 50].

192

## 193 Retrieval

194 To model the process that leads to a response we first consider that in some trials observers may  
195 erroneously identify a non-target item as being cued. Previous work indicates these “swap” errors  
196 occur due to uncertainty in memory for the cue features of the stimuli, in this case their locations  
197 [19, 56]. We assume that changes in variability in the cue features mirror those of the memory  
198 features, leading swap frequency to decrease exponentially as a function of presentation duration and  
199 increase linearly with retention interval (Fig. S3):

$$p_{\text{swap}} = (N - 1) \left[ \left( \frac{1}{N} - r_{\text{spatial}} t_{\text{cue}^*} \right) e^{-\frac{t_{\text{offset}}}{\tau_{\text{spatial}}}} + r_{\text{spatial}} t_{\text{cue}^*} \right] \quad (7)$$

200 where  $\tau_{\text{spatial}}$  is the time constant related to presentation duration, and  $r_{\text{spatial}}$  is the rate constant  
201 related to the retention interval.

202

203 If  $\theta$  is the true feature value of the item identified as the target (i.e. the cued item with probability  
204  $1 - p_{\text{swap}}$ , a randomly selected non-cued item with probability  $p_{\text{swap}}$ ), then due to diffusion (Eq. 5)  
205 the value encoded in the VWM population at the time of retrieval is given by

$$\theta^* \sim \mathcal{WN}(\theta, \sigma^2(t_{\text{cue}^*})) \quad (8)$$

206 We model retrieval as estimation of  $\theta^*$  based on spiking activity in the VWM population that encodes  
207 the selected item. For this purpose we assume an idealized set of tuning functions, where the mean  
208 response of neuron  $i$  encoding orientation  $\theta$  with population gain  $\gamma$  is described by

$$f_i(\theta, \gamma) = \frac{\gamma}{n} \exp(\kappa(\cos(\theta - \varphi_i) - 1)) \quad (9)$$

209 where  $n$  is the number of neurons, and  $\kappa$  determines the tuning width. The preferred orientations of  
210 the neurons,  $\varphi_i$ , are evenly distributed throughout the circular space to provide uniform coverage.  
211 The spike count produced by each neuron is drawn from a Poisson distribution,

$$r_i \sim \text{Poisson}(f_i(\theta^*, \gamma_{\text{wm}^*})) \quad (10)$$

212 and the decoded orientation estimate is obtained by maximum likelihood estimation based on the  
213 spike counts:

$$\hat{\theta} = \arg \max_{\theta} p(\mathbf{r}|\theta). \quad (11)$$

## 214 Additional assumptions

To fit the model to behavioral data, we make several further simplifying assumptions. We assume that the exponential decay of the sensory signal is rapid enough that there is effectively no information remaining by the time the VWM population is decoded to generate a response. This allows us to approximate the VWM activity at the time of decoding by the asymptotic VWM activity were the sensory decay to continue indefinitely:

$$\gamma_{\text{wm}^*} \approx \gamma_{\text{wm}}(\infty) \quad (12)$$

215 Next, we identify diffusion in the encoded value at the time of retrieval with diffusion at the time  
 216 of target item identification (justifying the use of  $t_{\text{cue}^*}$  in Eq. 8. We reason that the rate of diffusion  
 217 is slow enough relative to the rate of sensory decay, that any additional diffusion in the brief period  
 218 of post-cue sensory accumulation is negligible.

219  
 220 In Experiment 1 (see below), a task with a fixed 200 ms exposure period, we assume that the  
 221 initial encoding of all items into VWM is complete by the time of stimulus offset, i.e. that VWM  
 222 activity at this time can be approximated by its asymptotic level reflecting normalization:

$$\gamma_{\text{wm}}(t_{\text{offset}}) \approx \tilde{\gamma}_{\text{wm}}/N \quad (13)$$

223 Finally, in the condition of Experiment 1 where memory array and cue are presented simultaneously,  
 224 we assume that only the cued feature is encoded in VWM, reaching the maximum amplitude,  $\tilde{\gamma}_{\text{wm}}$ ,  
 225 irrespective of set size. Maximum likelihood fits were obtained via the Nelder-Mead simplex method  
 226 (function *fminsearch* in Matlab). All parameters and variables used to describe the DyNR model are  
 227 listed in Table 1.

Table 1: DyNR model parameters (1–9) and other variables (10–24) used in model description.

| No. | Parameter/variable           | Description                                            |
|-----|------------------------------|--------------------------------------------------------|
| 1   | $\tilde{\gamma}_{\text{wm}}$ | Maximum VWM signal amplitude                           |
| 2   | $\kappa$                     | Tuning curve width                                     |
| 3   | $\tau_{\text{rise}}$         | Rise constant of the sensory temporal filter           |
| 4   | $\tau_{\text{decay}}$        | Decay constant of the sensory temporal filter          |
| 5   | $\tau_{\text{wm}}$           | Time constant of accumulation into VWM                 |
| 6   | $\sigma_{\text{diff}}^2$     | Base diffusion rate                                    |
| 7   | $\tau_{\text{spatial}}$      | Time constant for spatial encoding                     |
| 8   | $r_{\text{spatial}}$         | Rate constant for spatial diffusion                    |
| 9   | $b$                          | Scaling parameter for Hick’s law                       |
| 10  | $t$                          | Time, relative to stimulus onset ( $t = 0$ )           |
| 11  | $t_{\text{offset}}$          | Time of stimulus offset                                |
| 12  | $t_{\text{cue}}$             | Time of cue onset                                      |
| 13  | $t_{\text{cue}^*}$           | Time an item is identified for report                  |
| 14  | $N$                          | Number of items in stimulus array                      |
| 15  | $M(t)$                       | Number of items in memory at time $t$                  |
| 16  | $\tilde{\gamma}_{\text{s}}$  | Maximum sensory signal amplitude                       |
| 17  | $\gamma_{\text{s}}(t)$       | Sensory signal amplitude at time $t$                   |
| 18  | $\gamma_{\text{wm}}(t)$      | VWM signal amplitude at time $t$                       |
| 19  | $\gamma_{\text{wm}^*}$       | VWM signal amplitude at the time of decoding           |
| 20  | $\sigma^2(t)$                | Accumulated diffusion at time $t$                      |
| 21  | $n$                          | Number of neurons                                      |
| 22  | $\theta$                     | True stimulus feature value                            |
| 23  | $\theta^*$                   | Encoded stimulus feature value at the time of decoding |
| 24  | $\hat{\theta}$               | Decoded stimulus feature value                         |



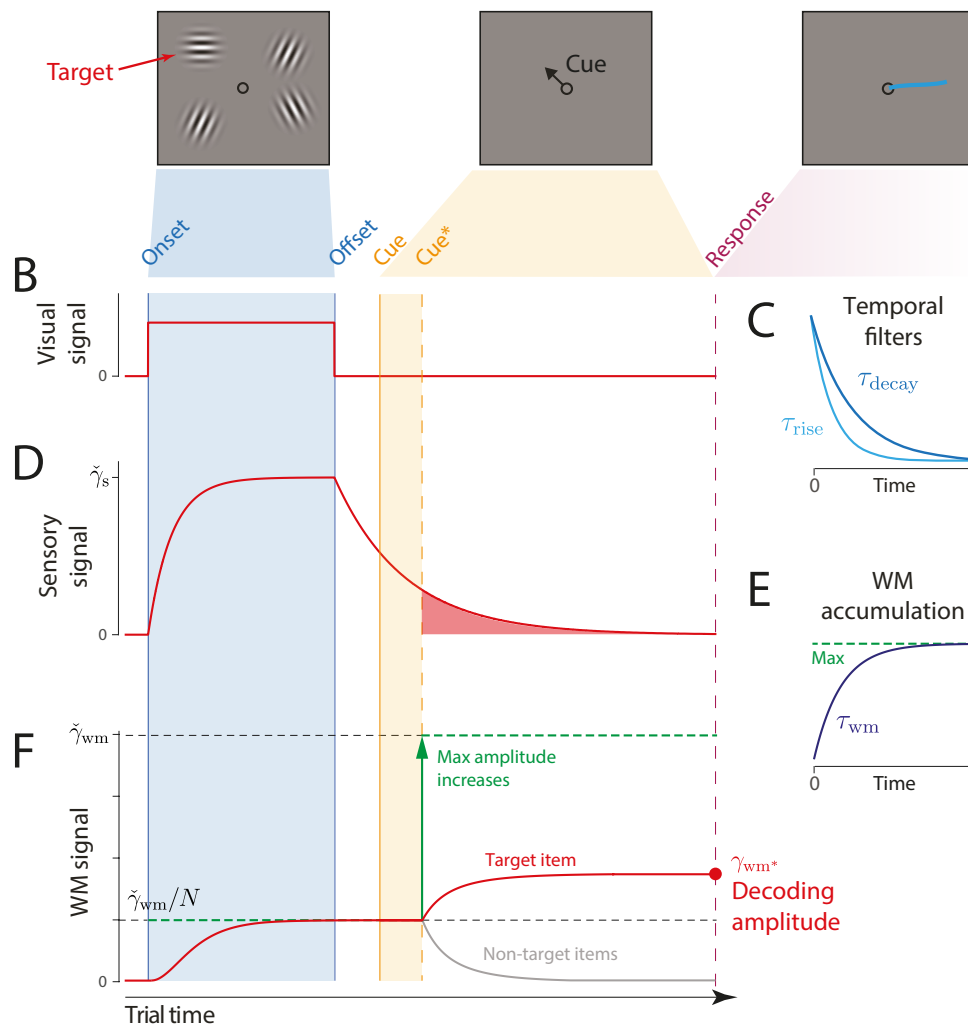

## 228 Overview of Experiments

229 We tested predictions of the Dynamic Neural Resource model against empirical data collected in  
 230 continuous report tasks. In Experiment 1 (Fig. S1A & B), observers were presented with an array  
 231 of oriented stimuli for a fixed duration followed after a variable delay by a visual cue identifying  
 232 one of the preceding stimuli whose orientation should be reported. This experiment was designed  
 233 to investigate the contribution of decaying sensory representations following stimulus offset to the

234 dynamics of recall fidelity. Experiment 2 (Fig. S1C) was aimed at expanding the results of the first  
235 experiment to now also assess the accumulation of information during the time the stimuli were  
236 visible. In this case, the exposure duration was varied while the delay before the visual cue was  
237 held constant. In both experiments we varied the number of stimuli in the array (set size) to assess  
238 capacity limitations affecting encoding and maintenance.

239

240 To provide additional validation of the DyNR model, we also tested its predictions against data from  
241 a previously published continuous report experiment (Experiment 1 in 12) and one additional dataset  
242 collected as part of a separate study [57]. A detailed description of all experiments is provided in  
243 Supplementary Information.

## 244 Results

### 245 Experiment 1: Delay duration

246 In Experiment 1, we evaluated the time course of VWM fidelity over brief memory intervals. Previous  
247 work has demonstrated that immediately after a stimulus physically disappears, its representation  
248 briefly persists in the sensory system in the form of residual neural activity [33]. Accumulation of  
249 this lingering sensory activity into VWM could enable superior recall of information [51] within the  
250 constraints of a finite VWM resource that strongly limits representational fidelity [3]. To describe  
251 these dynamics, we examined human recall of orientation stimuli presented in arrays of varying sizes  
252 and probed after a variable delay ranging from 0 ms to 1000 ms. Here we focus on an experimental  
253 condition in which retinal afterimages were suppressed by a phase shift towards the end of stimuli  
254 presentation. Validation of this method and results from the condition without a phase shift are  
255 provided in the Supplementary Information.

256

257 **Experimental data.** Recall error distributions and mean performance in Experiment 1 are  
258 plotted in Figs. 3A and B. Response error (measured as RMSE) increased with both set size  
259 and delay duration. A repeated measures ANOVA revealed a significant effect of set size  
260 ( $F_{(2,18)} = 117.8, p < .001, \eta^2 = .44$ ), delay time ( $F_{(5,45)} = 52, p < .001, \eta^2 = .23$ ), and their  
261 interaction ( $F_{(10,90)} = 26.7, p < .001, \eta^2 = .13$ ) on response error. We further explored this  
262 interaction, first finding response error in the 1 item condition (red in Fig. 3) did not change with  
263 delay ( $F_{(5,45)} = 1.32, p = .27, \eta^2 = .07$ ). This was supported by Bayesian analysis ( $BF_{10} = 0.34$ )  
264 which found weak to moderate evidence against modulation of 1 item recall by memory delay. In  
265 contrast, response error increased with delay for the remaining two set sizes (4 items, green; 10  
266 items, blue; main effect:  $F_{(5,45)} = 55, p < .001, \eta^2 = .48$ ). This increase in response error consisted of  
267 an initial rapid rise (over the first 200 ms), followed by a more gradual increase as the delay between  
268 stimulus and cue increased. Next, we found a modulating effect of delay on recall for the remaining  
269 two set sizes (interaction:  $F_{(5,45)} = 10.1, p < .001, \eta^2 = .05$ ). The direct comparison revealed that  
270 the increase in response error with delay ( $\Delta\text{RMSE} = \text{RMSE}_{1000\text{ms}} - \text{RMSE}_{\text{Simult}}$ ) was greater when  
271 observers memorized more items ( $t_{(9)} = 9.1, p < .001, d = 2.88$ ).

272

273 One surprising result was the observed set size effect in the 0 ms delay condition  
274 ( $F_{(2,18)} = 23.7, p < .001, \eta^2 = .53$ ) consistent with a stepwise increase in recall error with set  
275 size (pairwise comparison,  $t_{(9)} \geq 2.88, p \leq .036, d \geq 0.91$ , Bonferroni correction applied). Im-  
276 portantly, this effect was a consequence of responding based on a memory of the stimulus, since  
277 orientation reproduction was comparable across set sizes in the perceptual condition (simultaneous  
278 presentation;  $F_{(2,18)} = 1.26, p = .3, \eta^2 = .04, BF_{10} = 0.47$ ). Previous studies have characterized  
279 iconic memory as an effectively unlimited store, capable of holding any number of items without a  
280 consequent loss of fidelity [58, 28]. While our modelling ultimately affirmed this conception of IM,  
281 we nonetheless show that recall of information is contingent on the number of objects concurrently  
282 in memory from the moment stimuli physically disappear (see below).

283

284 Taken together, these results provide evidence that the fidelity of stored representations changes  
285 dramatically over the first few moments after stimuli offset. We next aimed to explain the neural  
286 computations supporting these dynamics. In summary, behavioral data displayed three key charac-  
287 teristics we aimed to explain, all visible in Fig. 3B. First, recall fidelity for a single item remained  
288 relatively stable across changes in delay, and was the same as perceptual fidelity. Second, recall

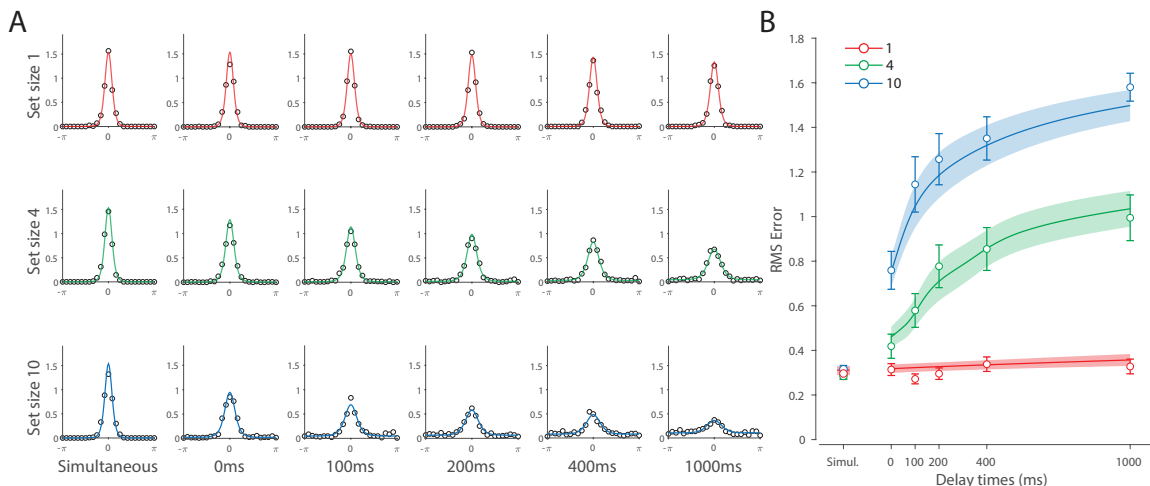

Figure 3: Experiment 1 data and model fits show the consequences of varying set size and delay duration on WM reproduction error. (A) Empirical recall error distributions (black circles) and the DyNR model fits (colored curves). Different panels correspond to different set sizes (rows) and delays (columns). (B) Corresponding RMS errors from experimental data (circles and errorbars) and the DyNR model fits (curves and error patches). Error bars and patches indicate  $\pm 1$  SEM.

289 fidelity for higher set sizes showed substantial, non-linear temporal dynamics. Lastly, recall fidelity  
 290 was contingent on the number of stored items from the moment stimuli disappeared.

291

292 **Dynamic Neural Resource model.** Curves in Figs. 3A and B show fits of the model with  
 293 maximum likelihood (ML) parameters (mean  $\pm$  SE: population gain  $\gamma = 59.8 \pm 3.3$ , tuning width  
 294  $\kappa = 3.21 \pm 0.2$ , sensory decay time constant  $\tau_{\text{decay}} = 0.21 \pm 0.052$ , VWM accumulation time  
 295 constant  $\tau_{\text{WVM}} = 0.096 \pm 0.045$ , cue processing constant  $b = 0.171 \text{ s} \pm .055 \text{ s}$ , base diffusion  $\sigma_{\text{diff}}^2$   
 296  $= 0.03 \pm 0.017$ , swap probability  $p = 0.027 \pm 0.009$ ). The model provided a close fit to response  
 297 error distributions (Fig. 3A) and summary statistics (Fig. 3B; see also Fig. S3 for reproduction of  
 298 swap error frequencies), successfully reproducing the pattern of changes with set size and delay. In  
 299 particular, the model accounted for the three key observations identified above.

300

301 First, the model predicted the near-constant recall fidelity observed for a single item across these  
 302 short retention intervals. The neural signal associated with the target object at recall depends on  
 303 the normalized signal in VWM at offset supplemented by the available sensory signal post-cue. The  
 304 sensory signal is integrated into VWM after the cue to fill any unallocated neural resource that arose  
 305 by discarding uncued items. In the case of a single item, the entirety of VWM resources are allocated  
 306 to one object during encoding, so no resource is freed by the cue that would allow the signal to be  
 307 further strengthened based on the decaying sensory representation.

308

309 Importantly, this prediction contradicts the classical view of direct read-out from IM, according  
 310 to which representational fidelity should be enhanced with very short delays irrespective of VWM  
 311 limitations (see *Alternative accounts* below for a formal test of such a model). Note that the DyNR  
 312 model nonetheless predicts some deterioration in fidelity over time even for a single item, due to  
 313 noise-driven diffusion of the stored value. However, based on previous reports, we expected this  
 314 process to be substantially slower and the impact on single item precision relatively small on this  
 315 ( $\leq 1$  s) timescale. The fitted diffusion parameters and resulting shallow slope of fitted RMS error  
 316 (red curve in Fig. 3B) confirmed this.

317

318 Second, the neural model predicts the specific pattern of dynamics observed in trials with multiple  
 319 items (set sizes 4, green, and 10, blue curves). Once the cue is presented, resources encoding uncued  
 320 items are freed and the decaying sensory signal representing the target item is further integrated into  
 321 VWM, still subject to limited total VWM resources but now without competition from other items.  
 322 Due to exponential decay of the sensory signal, the increase in fidelity thus accrued changes rapidly  
 323 with retention interval over the first few hundred milliseconds. At longer delays, the cue identifies

324 the target only after the sensory signal has effectively disappeared, so the VWM signal representing  
325 the target item remains at the normalized level reflecting equal distribution between all items in the  
326 memory array, and memory dynamics consist only of the more gradual deterioration of fidelity due  
327 to accumulated noise in the encoded value.

328

329 Finally, the DyNR model predicts the presence of a set size effect on fidelity throughout the entire  
330 memory period, including the no delay (0 ms) condition in which the cue onset was coincident  
331 with stimulus offset. In the model, this behavior emerges as a consequence of two independent  
332 processes. First, at the end of stimulus presentation, items within smaller (lower set size) arrays  
333 are encoded in VWM with higher signal amplitude, reflecting normalization. This signal strength  
334 represents a baseline that can be supplemented by further integration of the sensory signal after  
335 an early cue. However, if the sensory decay is sufficiently rapid, then even if the cue is presented  
336 immediately the target representation will not attain the maximum amplitude (equivalent to set  
337 size of one) starting from a lower baseline. Second, as described by Hick's Law [53] it takes  
338 longer to identify the target item based on the cue as the number of alternatives increases (see  
339 *Alternative models* below for a formal test of this assumption). As a result, for higher set sizes, less  
340 sensory signal encoding the target item remains to be integrated into VWM once it has been identified.

341

342 **Model variants.** We next focused on alternative explanations for the temporal dynamics observed  
343 in Experiment 1. Specifically, we examined whether the observed dynamics could be accounted for  
344 either solely by post-stimulus changes in neural signal amplitude or solely by noise-driven diffusion  
345 of stored values. To pre-empt our conclusions, we demonstrate that both components are needed  
346 to explain the observed dynamics in memory fidelity. Moreover, to more closely examine the role  
347 of diffusion in WM dynamics, we fit our neural model to an additional dataset collected in our  
348 lab ([57]; see Additional dataset 1 in Supplementary Information). This experiment used longer  
349 delays compared to those used in Experiment 1, and therefore precluded any beneficial effect of  
350 post-stimulus sensory information, while at the same time allowing the diffusion to operate over  
351 a longer period. This experiment allowed us to test whether diffusion is sufficient to account for  
352 human recall errors with longer memory delays.

353

354 *Fixed neural signal.* A recent computational study on forgetting in VWM proposed that diffusion is  
355 sufficient to explain memory dynamics over delay [10]. To test for this, we developed two reduced  
356 versions of the DyNR model in which the diffusion process was solely responsible for memory fidelity  
357 dynamics. In both variants, the sensory signal terminated abruptly with stimuli offset, so the VWM  
358 signal encoding the stimuli was independent of the delay duration and equal to the limit imposed by  
359 normalization ( $\tilde{\gamma}_{\text{vwm}}/N$ ). In the first variant, the diffusion rate was constant across set sizes, as in  
360 the full model. The formal model comparison demonstrated that the full DyNR model performed  
361 better than this simplified alternative ( $\Delta\text{AIC} = 609.5$ ).

362

363 In the second variant, we allowed the diffusion rate to increase proportionally with set size (for a  
364 similar proposal see [59]). This model was again outperformed by the full DyNR model ( $\Delta\text{AIC} =$   
365 666.4). Critically, both models tested here failed to qualitatively reproduce the observed non-linear  
366 pattern of changes in recall error with time, notably overestimating recall error at the shortest delays  
367 by assuming no modulation in the representational signal (Fig. S4).

368

369 *Diffusion.* We developed two variants of the proposed neural model to test the role of diffusion. In  
370 the first variant, we completely omitted the diffusion process from the model to test whether the  
371 sensory signal modulation during the retention period is sufficient to explain temporal dynamics in  
372 recall fidelity. It could be argued that diffusion accounts for only minor changes in precision over  
373 brief delays as used here, and therefore adds unnecessary complexity to the proposed model without  
374 improving the fit substantially. However, the formal model comparison revealed that the full DyNR  
375 model provides a better fit to human recall error compared to the matching model without diffusion  
376 ( $\Delta\text{AIC} = 17.9$ ).

377

378 The second variant was identical to the proposed model, except that we replaced the constant  
379 diffusion rate with a set size scaled diffusion rate (see Eq 10). The model comparison showed that the  
380 full DyNR model also outperformed this variant ( $\Delta\text{AIC} = 29.8$ ). While both model variants quali-  
381 tatively reproduced the increase in memory error with delay and set size, the pattern of variability

382 was better explained by the model with a constant diffusion rate across set sizes. Although a more  
 383 substantial diffusion effect could become apparent with longer delays than those used here, previous  
 384 work demonstrated that noise-driven diffusion causes representations to deteriorate throughout the  
 385 entire retention period [55].

386

387 Finally, we examined the role of diffusion with longer memory intervals in a separate experiment using  
 388 variable set sizes and memory intervals (1 and 7 seconds) (for full details see Additional dataset 1 in  
 389 Supplementary Information). We demonstrated that, once sensory information decayed completely,  
 390 an accumulation of error during retention interval accounted for continuing memory deterioration.  
 391 Together, the results presented here corroborate findings on the role of diffusion in temporal dynamics  
 392 of recall fidelity [9].

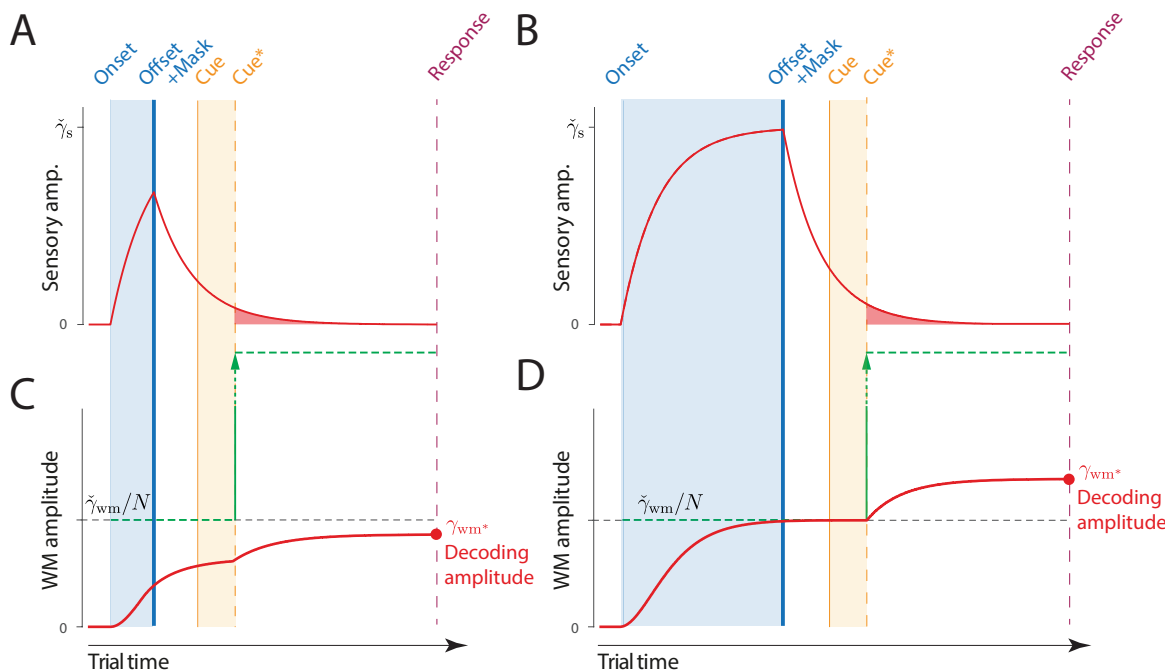

Figure 4: Time course of sensory and WM gain with variable exposure duration.

(A, B) The signal amplitude in the sensory population increases from stimulus onset, exponentially approaching the maximum sensory activity ( $\tilde{\gamma}_s$ ). For shorter presentation durations (A) the attained amplitude at stimulus offset is only a fraction of the maximum (compare B, late offset). Following offset, sensory areas produce a decaying neural response, that is curtailed (faster decay) but not abolished by a backward mask.

(C, D) Information about the stimulus is accumulated in WM from sensory activity. A shorter presentation (C) provides less sensory evidence for the initial accumulation of all items into VWM (compare D, late offset), and subsequently less decaying sensory activity that can supplement VWM activity for the target item following the cue.

### 393 Experiment 2: Exposure duration

394 In Experiment 2, we evaluated the encoding phase of VWM, by testing recall of orientation stimuli  
 395 displayed in arrays of variable size presented for variable durations. In the DyNR model, increasing  
 396 the sensory evidence by prolonging stimulus presentation has a favorable effect on later recall of  
 397 stimulus, as more of that evidence can be accumulated into VWM. Importantly, this accumulation  
 398 is also capped by the VWM resources available to store it.

399

400 **Experimental data.** Figure 5 shows the response error for different presentation durations  
 401 and set sizes. Consistent with previous findings, response error can be seen to decrease with  
 402 prolonged presentation duration, but increase as the number of items in memory increases. This was  
 403 confirmed with a significant effect of display duration ( $F_{(6,72)} = 29.01, p < .001, \eta^2 = .21$ ), set size  
 404 ( $F_{(2,24)} = 112.51, p < .001, \eta^2 = .54$ ), and their interaction ( $F_{(12,144)} = 2.58, p = .004, \eta^2 = .019$ ).

405 We further explored this interaction by first confirming that response error decreased with display  
 406 duration within each set size ( $F_{(6,72)} \geq 10.24, p < .001, \eta^2 \geq .26$ ). A consistent pattern was observed  
 407 across set sizes, comprising an initial rapid decrease in response error over the briefest presentation  
 408 times (first 200 ms), followed by saturation at prolonged exposure durations. Next, we calculated  
 409 the change in recall error between the longest and the shortest display exposure within each set  
 410 size, revealing that response error decreased more rapidly with display time as the number of items  
 411 in memory decreased (ANOVA:  $F_{(2,24)} = 7.79, p = .002, \eta^2 = .21$ ; corrected pairwise comparisons:  
 412  $t_{1-4} = 3.65, p = .016, d = 0.87, t_{4-10} = 0.96, p = .72, d = .27$ ).  
 413

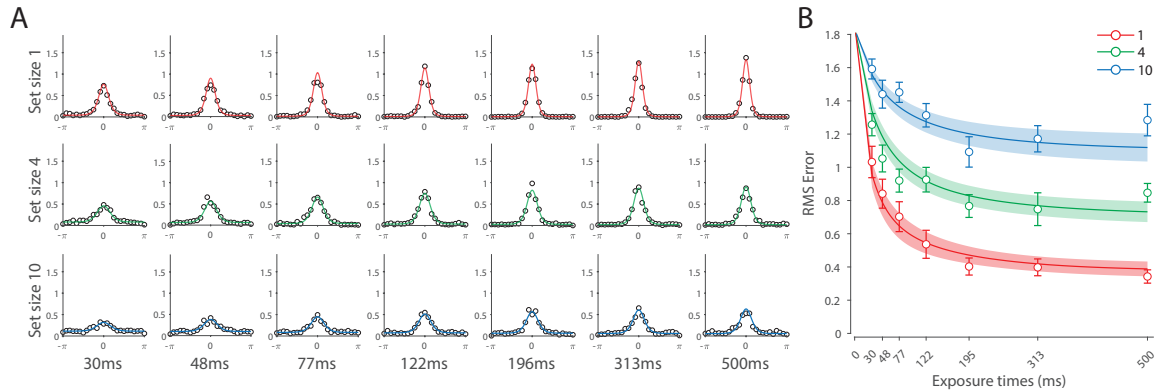

Figure 5: Experiment 2 results and modelling data show the consequences of varying set size and stimulus exposure time on VWM reproduction error. **(A)** Empirical recall error distributions (black circles) and the DyNR model fits (colored curves). Different panels correspond to different set sizes (rows) and exposure durations (columns). **(B)** Corresponding RMS errors from experimental data (circles and errorbars) and the DyNR model fits (curves and error patches). Error bars and patches indicate  $\pm 1$  SEM.

414 These results reveal the time course of information accumulation into VWM and forming of stable  
 415 representations. We again identified several key characteristics of the dynamics of recall fidelity  
 416 in the data (Fig. 5B) to test against the DyNR model. Consistent with previous studies, we found  
 417 recall fidelity changed with both presentation duration and the number of presented stimuli [35–37].  
 418 Specifically, as display duration increased from the shortest exposure, recall error showed an initial  
 419 rapid decrease followed by a gradual levelling-off. As set size increased, the initial slope became  
 420 shallower and the plateau occurred at a higher level of error.  
 421

422 **Dynamic Neural Resource model.** Curves in Figs. 5A & B show fits of the model with maximum  
 423 likelihood (ML) parameters (mean  $\pm$  SE: population gain  $\gamma = 188.5 \pm 109.6$ , tuning width  $\kappa = 10.2$   
 424  $\pm 6.08$ , sensory rise time constant  $\tau_{\text{rise}} = 0.33 \pm 0.18$ , sensory decay time constant  $\tau_{\text{decay}} = 0.61$   
 425  $\pm 0.19$ , VWM accumulation time constant  $\tau_{\text{WVM}} = 0.8 \pm 0.34$ , cue processing constant  $b = 0.2 \text{ s} \pm$   
 426  $.09 \text{ s}$ , base diffusion  $\sigma_{\text{diff}}^2 = 0.28 \pm 0.08$ , spatial uncertainty time constant  $\tau_{\text{spatial}} = 0.013 \pm 0.004$ ,  
 427 swap probability  $p = 0.053 \pm 0.01$ ). The model provided an excellent quantitative fit to response  
 428 distributions (Fig. 5A) and RMSE (Fig. 5B), successfully reproducing the pattern of changes with  
 429 set size and presentation duration.  
 430

431 The model predicted that information from a visible stimulus accrues at a high rate immediately after  
 432 the stimulus onset, consistent with observed changes in human recall error over stimulus durations  
 433 up to 200 ms (Fig. 5). This initial high encoding rate emerges naturally in the model due to the  
 434 joint dynamics of sensory and VWM populations. In the sensory population, a low-pass temporal  
 435 filter serves as a neural gain control mechanism, attenuating neural response to transient changes  
 436 in stimuli [40, 43]. As a consequence, the neural response to stimulus onset increases exponentially  
 437 (Fig. 4). The information from sensory areas is accumulated into VWM, such that the accumulation  
 438 rate is directly proportional to the difference between the current and saturating state (i.e. the rate  
 439 is faster when accumulated information is far from the saturating state). Therefore, dynamics in the  
 440 sensory and VWM population jointly account for the initial high rate of information extraction from  
 441 stimuli, and its dependence on set size.

442

443 After the initial steep change, the model predicts that recall fidelity will asymptote. This was again  
444 observed in human behavior (Fig. 5). Extending stimulus presentation beyond 200 ms had negligible  
445 impact on recall precision, consistent with previous studies [35]. The model explains this behavior by  
446 describing how sensory signal and VWM accumulation independently saturate with time. Since the  
447 temporal filtering in the sensory population attenuates only high-frequency stimuli (i.e. very short  
448 presentations), with sufficient exposure, the sensory signal plateaus, resulting in a stable feed-forward  
449 input to VWM. Similarly, VWM signal strength is subject to limits determined by normalization.  
450 Once the accumulated information reaches the normalized maximum set by the number of objects in  
451 memory, further accumulation of sensory evidence is not possible. Following the cue, a portion of the  
452 resource is freed, allowing the target representation to be further strengthened. However, because  
453 the sensory signal plateaus at longer exposures, the information available for integration after the  
454 cue remains constant across the longer exposures, supplementing normalized VWM signal by the  
455 same amount. The result is a plateau in fidelity that varies with set size.

456

457 **Model variants.** We investigated whether post-stimulus sensory persistence contributed to the  
458 model fits in Experiment 2. We assumed that the signal persisting after stimulus offset would be  
459 impaired but not eliminated by the subsequent presentation of a noise mask in this experiment [47].  
460 An alternative account suggests that the mask immediately terminates any stimulus-related signal.  
461 To test for this, we fit a variant of the DyNR model in which the sensory signal was terminated by  
462 the onset of the mask, providing a feed-forward signal to VWM only for the period of the stimulus  
463 presentation. We found that the proposed DyNR model, in which some sensory signal persists  
464 after the mask onset, gave a better account of the data than this model variant ( $\Delta\text{AIC} = 446.67$ ).  
465 Although the alternative model captured the general pattern of changes in memory fidelity with  
466 exposure duration, it mispredicted fidelity at shorter exposures, in particular the effect of set size  
467 (Fig. S5A).

468

469 A testable prediction of this alternative model is that the memory fidelity at recall should obey the  
470 neural normalization principle because there was no additional signal to supplement the presentation  
471 after initial encoding. To test for this, we additionally fitted each exposure condition separately  
472 using the original Neural Resource model with only three parameters (i.e., neural gain, tuning  
473 width, and swap probability). This model failed to predict actual fidelity levels at recall (Fig. S5B),  
474 corroborating the findings of the model comparison.

475

476 Finally, to investigate the role of the post-stimulus sensory persistence on encoding dynamics, we  
477 fit the DyNR model to an additional dataset from Bays et al. [35] (for full details see Additional  
478 dataset 2 in Supplementary Information). This experiment aimed to investigate VWM dynamics  
479 during encoding, like our Experiment 2. In contrast to our Experiment 2, Bays et al. [35] used a  
480 much longer delay interval (1100 ms vs 100 ms), precluding the possibility of further accumulation  
481 of sensory evidence following the cue. We expected that the DyNR model could account for memory  
482 dynamics in this study without any post-stimulus sensory activity. This was confirmed by accurately  
483 reproducing memory dynamics with a model in which encoding into VWM relied only on sensory  
484 evidence during stimulus presentation (detailed results in Supplementary Information).

485

## 486 **Alternative accounts**

487 Having demonstrated the need for both post-stimulus sensory persistence and diffusion to account  
488 for empirical data, we next considered alternatives to our account of VWM accumulation and  
489 information read-out.

490

491 **Direct read-out of sensory information.** In the DyNR model, recall fidelity is enhanced following  
492 the cue by integrating remaining sensory activity into capacity-limited VWM. As a consequence,  
493 response precision is bounded from above by the memory limit irrespective of the available sensory  
494 signal. An alternative possibility is that the decaying sensory representation can be directly read  
495 out following the cue to inform a response, bypassing working memory limitations. To formalize  
496 this alternative model, we assumed that independent sensory and VWM representations would be

497 optimally combined via summation of neural activity to yield population gain

$$\gamma_{\text{sum}}^* = \gamma_{\text{wm}}(t_{\text{cue}^*}) + \gamma_{\text{s}}(t_{\text{cue}^*}) \quad (14)$$

498 The model is otherwise identical to the proposed DyNR model. A distinctive prediction of this  
499 model is that the precision of recall changes exponentially with delay for every set size, including  
500 1 item (Fig. S8). This prediction is qualitatively inconsistent with the pattern of results observed  
501 in Experiment 1, in contrast with the DyNR model which does not predict any beneficial effect of  
502 earlier cues with set size 1. This alternative model provided a worse fit to data from Experiment 1  
503 ( $\Delta\text{AIC} = 164$ ) and Experiment 2 ( $\Delta\text{AIC} = 84.6$ ), for combined evidence favouring the DyNR model  
504 of  $\Delta\text{AIC} = 248.6$ .

505  
506 **Cue processing.** In the DyNR model, we assumed that identifying the target stimulus based on the  
507 cue is time-consuming, and becomes more so as the number of alternatives increases. Cue processing  
508 time encompasses perceptual, attentional, and decision components needed to interpret and act on  
509 the cue. We tested the necessity of this component by fitting a model variant in which VWM started  
510 accumulating evidence about the cued item at the moment of cue presentation. This model provided  
511 a worse fit to empirical data from both Experiment 1 ( $\Delta\text{AIC} = 84.5$ ) and Experiment 2 ( $\Delta\text{AIC} =$   
512  $107.5$ ), for total evidence in favor of the DyNR model of  $\Delta\text{AIC} = 192$  (Fig. S6). We fit another  
513 variant in which cue processing time was constant across set sizes. This alternative provided a worse  
514 fit to the data in Experiment 1 ( $\Delta\text{AIC} = 191.6$ ) and Experiment 2 ( $\Delta\text{AIC} = 105$ ), for combined  
515 evidence  $\Delta\text{AIC} = 296.6$  in favor of the full DyNR model that assumes cue processing time increases  
516 with set size. These results corroborate previous findings on the important role of cue processing  
517 time in models of attention [54] and IM [60].

518  
519 **Constant accumulation rate.** In the DyNR model, the rate of accumulation into VWM is propor-  
520 tional to the difference between the present VWM amplitude and the maximum normalized amplitude  
521 (Eq. 2). An arguably simpler assumption is that the neural signal approaches saturation at a constant  
522 rate [61, 62]. In particular, the rate at which the signal representing an item is transferred to VWM  
523 is constant and depends only on the number of encoded items, i.e.

$$\dot{\gamma}_{\text{wm}}(t) = \begin{cases} \gamma_{\text{s}}(t)/(M(t)\tau_{\text{wm}}) & \text{if } \gamma_{\text{wm}}(t) < \check{\gamma}_{\text{wm}}/M(t) \\ 0 & \text{otherwise.} \end{cases} \quad (15)$$

524 The dependence on  $M(t)$  satisfies the constraint that the neural resources in VWM are allocated at  
525 a constant rate, irrespective of the number of items. We applied this model to psychophysical data  
526 from both experiments (Fig. S7) and found it provides a worse fit to the data from Experiment 1  
527 ( $\Delta\text{AIC} = 11.5$ ) and Experiment 2 ( $\Delta\text{AIC} = 36.2$ ), for combined evidence favouring the DyNR model  
528 with exponential saturation ( $\Delta\text{AIC} = 47.7$ ).

## 530 Discussion

531 In the present study, we investigated the temporal dynamics of short-term recall fidelity. We con-  
532 ducted two new human psychophysical experiments and analyzed two existing datasets in order to  
533 characterize how recall errors are influenced by set size, stimulus duration and retention interval. We  
534 developed a Dynamic Neural Resource (DyNR) model to provide a mechanistic explanation of the  
535 observed behavior, capturing not only changes in overall fidelity but also the distribution of errors  
536 in the stimulus space and frequencies of swaps (intrusion errors). A key finding is that the benefit  
537 to recall precision observed at very short delays is due to additional post-cue integration of sensory  
538 information into working memory, and that direct retrieval from sensory memory is unable to account  
539 for the empirical patterns of error.

### 540 Sensory and WM dynamics during delay

541 In the first experiment we investigated the effects of brief unfilled delays on recall fidelity. With  
542 multi-item arrays, we observed that memory performance deteriorates precipitously over the first  
543 few hundred milliseconds after stimuli disappear, followed by a gradual levelling-off of error with  
544 longer delays (Fig. 3). These results are consistent with previously reported patterns of memory



545 dynamics [27–29, 31], and estimates of sensory decay ranging between 100 ms and 400 ms [63, 64].  
546 Here, we shed new light on these results by taking a computational approach in explaining observed  
547 temporal dynamics, and asking what this superior recall’s neural origin is and its relation with VWM.  
548 To answer these questions, we adapted the Neural Resource model of Bays [12] with a temporal  
549 component. The new DyNR model considers dynamics in a sensory neural population registering  
550 the stimuli and in a VWM population that stores the stimuli for later recall. Critically, our model  
551 assumes that objects encoded with limited precision into VWM can be flexibly supplemented with  
552 sensory activity following a recall cue, within a brief temporal window while the sensory population  
553 provides a feed-forward input post-stimulus. The boost in the representational VWM signal predicts  
554 a behavioral benefit of early cues that is consistent with our data and a large corpus of previous  
555 experiments [51].

556  
557 A common assumption in studies of visual short-term memory is that recall over brief delays is  
558 exclusively supported by one of two memory stores, IM or VWM [29, 30]. In this account, a  
559 cue presented within the first few hundred milliseconds after stimulus offset allows observers to  
560 access high resolution but rapidly deteriorating representations in IM; once the information in  
561 IM has decayed, objects must be retrieved from the capacity-limited VWM store. Two pieces  
562 of evidence from the current study contradict this view and strongly suggest that recall depends  
563 on VWM from the moment objects disappear. First, the recall benefit of short delays was not  
564 observed for one item arrays. We propose that this behavior reflects the fact that, during encoding,  
565 the entirety of the VWM resource is allocated to a single object, leaving no free capacity for  
566 further enhancement based on the available sensory signal post-cue. Second, we found clear  
567 evidence that recall fidelity varied with set size even with no delay between stimulus offset and  
568 cue (0 ms condition). We argue that this arises from the set-size dependence of representational  
569 fidelity in VWM, which is only incompletely compensated by integration of the decaying sensory  
570 signal post-cue, resulting in lower fidelity for higher set sizes. The DyNR model provides a success-  
571 ful quantitative account for these findings, which are in clear contrast with the traditional view of IM.

572  
573 The rapid changes in fidelity over short delays can be distinguished from dynamics over longer  
574 retention intervals. A number of recent studies have observed a slow deterioration of VWM precision  
575 over the course of prolonged retention [9, 21, 22, 65–67]. The causes of this deterioration are still  
576 contested, but growing evidence links this behavior to noise-driven diffusion. At a mechanistic  
577 level, diffusion is considered a fundamental property of continuous attractor networks of the kind  
578 commonly associated with models of working memory [68, 69]. In such networks, memorized features  
579 are represented as persistent activity “bumps” in the network’s representational feature space. Over  
580 a memory delay, the activity bump is sustained by balanced excitatory and inhibitory connections,  
581 while stochasticity in neural activity causes shifts of the bump along the feature dimension, taking  
582 the form of a random walk. Although we did not model the network processes governing stability  
583 and diffusion within neural populations, our implementation is consistent with random (Brownian)  
584 perturbation, as assumed by attractor models (see also 9).

585  
586 Our theoretical account of memory dynamics during delay differs from several existing models of  
587 forgetting, which emphasize diffusion as the dominant source of error in short-term memory (e.g.,  
588 10, 59). To solely account for the observed data in Experiment 1, diffusion would need to be  
589 strongest early in the retention period, followed by a much weaker diffusion with longer delays.  
590 However, it is unclear why the diffusion rate would change, and particularly slow down, with time.  
591 Assuming a constant neural signal encoding the stimulus, this would predict greater variability  
592 in neural activity initially compared to the later period after stimuli offset. This is inconsistent  
593 with electrophysiological data showing relatively stable levels of spiking variability throughout the  
594 memory delay period [70, 71]. The results observed here are consistent with the proposal that  
595 modulation of neural signal over short memory intervals accounts for an abrupt change in response  
596 fidelity, while diffusion accounts for a slower change that grows with time.

597  
598 In the present study, a model assuming a constant diffusion rate, independent of the stored number of  
599 items, was preferred to one in which diffusion rate increases linearly with set size. This is consistent  
600 with results of Shin et al. [66] who did not find a significant effect of set size on the rate of memory  
601 deterioration. In contrast to that, Koyluoglu et al. [59] recently proposed that the rate of diffusion  
602 scales with set size. However, this study did not account for the presence of swap errors, which we

603 found to increase with retention interval as well as set size. To draw strong conclusions about the  
604 dependence of diffusion on set size would require a future study to disentangle the different sources  
605 of error that could, in principle, increase with delay.

## 606 Sensory and WM dynamics during encoding

607 Having investigated memory degradation during the retention interval, in Experiment 2 we focused  
608 on the dynamics arising from accumulation of information during stimulus presentation. Using  
609 new psychophysical data, we showed that encoding of information into VWM is contingent on  
610 both presentation duration and the number of memorized stimuli. The observed patterns of data  
611 indicate that VWM encoding of elementary stimuli is mostly completed within the first 200 ms  
612 of presentation even at the largest set sizes, with minimal benefit of longer exposures, extending  
613 previous work [35–37]. This fast encoding process may have an adaptive role: with a key function  
614 of VWM to store and accumulate information across saccadic eye movements, an efficient system  
615 should deploy its resources within the duration of a typical gaze fixation [72].

616  
617 Our aim was again to move beyond the description of the encoding dynamics and to provide a  
618 biologically plausible neurocomputational account of these dynamics. To achieve that, we applied  
619 the same VWM accumulation process that operates post-cue to the sensory information during  
620 stimulus presentation. Using previously published and newly collected data, we show that a model in  
621 which VWM accumulates dynamical sensory input up to a fidelity limit can successfully account for  
622 patterns of human recall errors with variable set size and stimulus presentation. An important result  
623 of our modelling is that the accumulated information in VWM increases with a rate proportional to  
624 unfilled capacity. In particular, the model with such exponential accumulation provided a better fit  
625 than a model assuming a constant encoding rate. This parallels previous observations that models  
626 based on exponential-like extraction of information successfully characterize attention [73, 74],  
627 working memory encoding [35, 75], memory updating [76], and broader cognitive processes [77]. We  
628 hypothesize that this pattern represents an approach to an equilibrium state of balanced excitation  
629 from the sensory input and lateral inhibition within the VWM population, which is the basis for  
630 capacity of the memory system.

631  
632 Our computational account of VWM encoding dynamics differs from several existing modelling frame-  
633 works aiming to explain similar data. For example, the Theory of Visual Attention (TVA; [73]) assumes  
634 that visual stimuli participate in a parallel exponential race towards limited VWM. Like the DyNR  
635 model, TVA assumes a form of normalization in the sense that the speed with which items race to-  
636 wards VWM depends on the number of items in the visual field. Unlike our dynamic model, TVA is  
637 not a theory of VWM, and it considers VWM only as a storage for categorizations of visual objects.  
638 In particular, TVA takes into account the limits of VWM but does not specify why or how these  
639 limitations arise. Finally, TVA considers whether an object was selected for entry into VWM in an  
640 all-or-none fashion; our dynamic model is mostly concerned with the fidelity of representations. A  
641 somewhat alternative account of VWM encoding is provided by the Competitive Interaction Theory  
642 (CIT; [78]), which is similarly based on the Signal Detection theory and principles of normalization  
643 [39]. Like TVA, CIT is mostly focused on item selection and merely incorporates a concept of VWM  
644 capacity derived from object-based models of VWM. Although CIT had success in accounting for  
645 behavioral data from a two-alternative orthogonal discrimination task using up to four items and a  
646 limited range of encoding times, it remains an open question whether this model can account for error  
647 distributions as measured in a continuous report task, and a larger range of set sizes and stimulus  
648 exposures. Importantly, compared to both TVA and CIT, the DyNR model is strongly rooted in and  
649 inspired by findings from neuroscience. This not only adds to the biological plausibility of our model  
650 but also allows future studies to test the model’s predictions using physiological methods.

## 651 Neural mechanisms

652 The theory presented here generalizes the Neural Resource model of Bays [12], a simple encoding-  
653 decoding model in which visual features are represented in the noisy spiking activity of neural  
654 populations [15], and where the activity representing each feature scales inversely with the total  
655 number of representations, consistent with the prevalence of normalization mechanisms in the  
656 brain and observations from single-neuron recording [79] and fMRI decoding [80] studies. The

657 population coding in the model is based on an abstract idealization of neural response func-  
658 tions. Nevertheless, it has recently been shown that more realistic population coding schemes  
659 that allow for heterogeneity in neural tuning curves and correlated spiking activity as observed  
660 in visual cortex, maintain the key predictions of the idealized model [81, 13]. This may be seen  
661 as a consequence of the different population codes inducing a common representational geometry [82].

662  
663 We adapted the stationary VWM model by first incorporating a sensory population that provides  
664 an input drive to the VWM population. In parallel with neurophysiological observations, a common  
665 approach is to model these dynamics with a low-pass filter which acts like a neural gain modulation  
666 mechanism [43]. As a consequence, the sensory response to stimulus onset and offset is an exponential  
667 rise and decay in activity, respectively. The decaying component of the response has been recognized  
668 as a neural substrate of visual persistence and IM [34, 33]. Here, we modelled sensory decay with an  
669 exponential function [83], although other forms of decay have been proposed. For example, Loftus  
670 et al. [63] showed that iconic decay could be better captured using a gamma survival function,  
671 a generalization of exponential decay that could simply be implemented in our neural model by  
672 replacing a single filter with a cascade of exponential low-pass filters.

673  
674 In addition to the dynamics in the sensory population, two features of VWM introduce additional  
675 dynamics in representation fidelity: the accumulation of information (discussed above) and the  
676 diffusion of representations owing to accumulated noise. Although we did not aim to model the  
677 neural processes behind diffusion, our implementation is consistent with the consequences of neural  
678 variability in attractor networks [23, 69]. Converging neural evidence demonstrating such diffusion  
679 has been observed using single-unit neural recording in monkeys [24], as well as EEG [26] and fMRI  
680 [25, 84] studies in humans.

681  
682 Our model makes a clear distinction between dynamics in sensory and VWM populations, however,  
683 it remains agnostic as to whether the populations have the same or different anatomical locus [85].  
684 Albeit inspired by the properties of orientation-selective neurons in area V1, population tuning of  
685 this kind is a common coding motif across the brain [15]. While it could be considered efficient to  
686 use already specialized circuits to maintain as well as process visual information, it is still debated  
687 whether sensory areas are a feasible candidate for memory storage [86, 87]. While some studies have  
688 focused on prefrontal [88], parietal [89] or occipital [90] cortices as the primary locus of VWM, others  
689 argue for distributed storage by demonstrating that VWM contents can be decoded from imaging  
690 signals originating in multiple brain areas [91].

## 691 **Representational dynamics of cue-dimension features**

692 Memory retrieval failures in which a non-cued item is reported in place of the intended target represent  
693 an important source of error in VWM recall. These swap errors occur more often at higher set sizes and  
694 when spatial confusability is high [92, 93], as predicted by models in which they arise from uncertainty  
695 in the recall of cue-dimension features leading to incorrect selection of an item in memory [19, 56].  
696 In the current study, we assumed memory for spatial location (the cue feature) undergoes similar  
697 dynamics to memory for orientation (the report feature), and in particular that spatial information  
698 degrades with retention time [9], leading to changes in swap error frequency with delay interval.  
699 Similarly, during encoding the fidelity of spatial representation increases with the accumulation of  
700 sensory evidence [94], reducing the uncertainty at retrieval and consequently swap errors at longer  
701 stimulus exposure. Although we did not explicitly model the neural signals representing location,  
702 the modelled dynamics in the probability of swap errors were consistent with those of the primary  
703 memory feature. Future studies might develop and test more detailed models of the cue identification  
704 process based on how swap frequency changes with time.

## 705 **Removal of information from WM**

706 In the DyNR model, taking advantage of early cues requires rapid removal of the VWM signal  
707 associated with uncued items, to admit further accumulation of activity encoding the cued item. To  
708 achieve this, an active process of selective content elimination may be required [52], as opposed to  
709 a passive decay of uncued representations during the post-cue interval. Mounting evidence for such  
710 active removal has been provided at the behavioral [95] and neural [96] level. Importantly, studies

711 show that a functional role of such active removal is to release resources allocated to the uncued  
712 representations, facilitating the encoding of new information [97]. The fast reallocation of neural  
713 resources assumed by the DyNR model is consistent with such a description of active removal.

## 714 Data Availability

715 Data and code related to this study will be made available at <https://doi.org/10.17863/CAM.95223>.

## 716 Acknowledgments

717 We thank George Sperling and Sebastian Schneegans for helpful discussion, and Robert Taylor for  
718 help with Bayesian hierarchical modelling. This research was supported by the Wellcome Trust (grant  
719 106926 to PMB).

## 720 References

- 721 [1] Mark D’Esposito and Bradley R. Postle. The Cognitive Neuroscience of Working Memory.  
722 *Annual Review of Psychology*, 66(1):115–142, 2015. doi: 10.1146/annurev-psych-010814-015031.
- 723 [2] Tatiana Pasternak and Mark W. Greenlee. Working memory in primate sensory systems. *Nature*  
724 *Reviews Neuroscience*, 6(2):97–107, 2005. ISSN 1471-003X. doi: 10.1038/nrn1603.
- 725 [3] Wei Ji Ma, Masud Husain, and Paul M Bays. Changing concepts of working memory. *Nature*  
726 *Neuroscience*, 17(3):347–356, 2014. ISSN 1097-6256, 1546-1726. doi: 10.1038/nm.3655.
- 727 [4] Paul M. Bays, Sebastian Schneegans, Wei Ji Ma, and Timothy Brady. Representation and  
728 computation in working memory. October 2022. doi: 10.31234/osf.io/kubr9.
- 729 [5] H. B. Barlow. The Ferrier Lecture, 1980. Critical limiting factors in the design of the eye and  
730 visual cortex. *Proceedings of the Royal Society of London. Series B, Biological Sciences*, 212  
731 (1186):1–34, 1981. ISSN 0950-1193. doi: 10.1098/rspb.1981.0022.
- 732 [6] D. C. Van Essen, C. H. Anderson, and D. J. Felleman. Information processing in the primate  
733 visual system: an integrated systems perspective. *Science (New York, N.Y.)*, 255(5043):419–  
734 423, 1992. ISSN 0036-8075.
- 735 [7] Bingni W. Brunton, Matthew M. Botvinick, and Carlos D. Brody. Rats and Humans Can  
736 Optimally Accumulate Evidence for Decision-Making. *Science*, 340(6128):95–98, 2013. ISSN  
737 0036-8075, 1095-9203. doi: 10.1126/science.1233912.
- 738 [8] Joshua I. Gold and Michael N. Shadlen. The Neural Basis of Decision Making. *Annual Re-*  
739 *view of Neuroscience*, 30(1):535–574, 2007. ISSN 0147-006X, 1545-4126. doi: 10.1146/an-  
740 nurev.neuro.29.051605.113038.
- 741 [9] Sebastian Schneegans and Paul M. Bays. Drift in Neural Population Activity Causes Working  
742 Memory to Deteriorate Over Time. *The Journal of Neuroscience*, 38(21):4859–4869, 2018. ISSN  
743 0270-6474, 1529-2401. doi: 10.1523/JNEUROSCI.3440-17.2018.
- 744 [10] Matthew F. Panichello, Brian DePasquale, Jonathan W. Pillow, and Timothy J. Buschman.  
745 Error-correcting dynamics in visual working memory. *Nature Communications*, 10(1), 2019.  
746 ISSN 2041-1723. doi: 10.1038/s41467-019-11298-3.
- 747 [11] Freek van Ede, Sammi R. Chekroud, Mark G. Stokes, and Anna C. Nobre. Concurrent visual  
748 and motor selection during visual working memory guided action. *Nature Neuroscience*, 2019.  
749 ISSN 1097-6256, 1546-1726. doi: 10.1038/s41593-018-0335-6.
- 750 [12] P. M. Bays. Noise in Neural Populations Accounts for Errors in Working Memory.  
751 *Journal of Neuroscience*, 34(10):3632–3645, 2014. ISSN 0270-6474, 1529-2401. doi:  
752 10.1523/JNEUROSCI.3204-13.2014.

- 753 [13] Sebastian Schneegans, Robert Taylor, and Paul M. Bays. Stochastic sampling provides a unify-  
754 ing account of visual working memory limits. *Proceedings of the National Academy of Sciences*,  
755 page 202004306, 2020. ISSN 0027-8424, 1091-6490. doi: 10.1073/pnas.2004306117.
- 756 [14] Wei Ji Ma, Jeffrey M Beck, Peter E Latham, and Alexandre Pouget. Bayesian inference with  
757 probabilistic population codes. *Nature Neuroscience*, 9(11):1432–1438, 2006. ISSN 1097-6256,  
758 1546-1726. doi: 10.1038/nn1790.
- 759 [15] A. Pouget, P. Dayan, and R. Zemel. Information processing with population codes. *Nature*  
760 *Reviews Neuroscience*, 1(2):125–132, 2000. ISSN 1471-003X. doi: 10.1038/35039062.
- 761 [16] M Carandini and D.J. Heeger. Normalization as a canonical neural computation. *Nature*  
762 *Reviews Neuroscience*, 13(1), 2011. ISSN 1471-003X, 1471-0048. doi: 10.1038/nrn3136.
- 763 [17] Ivan Tomić and Paul M. Bays. Perceptual similarity judgments do not predict the distribution  
764 of errors in working memory. *Journal of Experimental Psychology: Learning, Memory, and*  
765 *Cognition*, 2022. ISSN 1939-1285, 0278-7393. doi: 10.1037/xlm0001172.
- 766 [18] Paul M. Bays and Robert Taylor. A neural model of retrospective attention in vi-  
767 sual working memory. *Cognitive Psychology*, 100:43–52, 2018. ISSN 00100285. doi:  
768 10.1016/j.cogpsych.2017.12.001.
- 769 [19] Sebastian Schneegans and Paul M. Bays. Neural Architecture for Feature Binding in Visual  
770 Working Memory. *The Journal of Neuroscience*, 37(14):3913–3925, 2017. ISSN 0270-6474,  
771 1529-2401. doi: 10.1523/JNEUROSCI.3493-16.2017.
- 772 [20] Paul M. Bays. A signature of neural coding at human perceptual limits. *Journal of Vision*, 16  
773 (11):4, 2016. ISSN 1534-7362. doi: 10.1167/16.11.4.
- 774 [21] Yoni Pertzov, Sanjay Manohar, and Masud Husain. Rapid forgetting results from competi-  
775 tion over time between items in visual working memory. *Journal of Experimental Psychology:*  
776 *Learning, Memory, and Cognition*, 43(4):528–536, 2017. ISSN 1939-1285, 0278-7393. doi:  
777 10.1037/xlm0000328.
- 778 [22] Rosanne L. Rademaker, Young Eun Park, Alexander T. Sack, and Frank Tong. Evidence of  
779 gradual loss of precision for simple features and complex objects in visual working memory.  
780 *Journal of Experimental Psychology: Human Perception and Performance*, 2018. ISSN 1939-  
781 1277, 0096-1523. doi: 10.1037/xhp0000491.
- 782 [23] Y. Burak and I. R. Fiete. Fundamental limits on persistent activity in networks of noisy neurons.  
783 *Proceedings of the National Academy of Sciences*, 109(43):17645–17650, 2012. ISSN 0027-8424,  
784 1091-6490. doi: 10.1073/pnas.1117386109.
- 785 [24] Klaus Wimmer, Duane Q Nykamp, Christos Constantinidis, and Albert Compte. Bump at-  
786 tractor dynamics in prefrontal cortex explains behavioral precision in spatial working memory.  
787 *Nature Neuroscience*, 17(3):431–439, 2014. ISSN 1097-6256, 1546-1726. doi: 10.1038/nn.3645.
- 788 [25] Phui Cheng Lim, Emily J. Ward, Timothy J. Vickery, and Matthew R. Johnson. Not-so-  
789 working Memory: Drift in Functional Magnetic Resonance Imaging Pattern Representations  
790 during Maintenance Predicts Errors in a Visual Working Memory Task. *Journal of Cognitive*  
791 *Neuroscience*, pages 1–15, 2019.
- 792 [26] Michael J. Wolff, Janina Jochim, Elkan G. Akyürek, Timothy J. Buschman, and Mark G.  
793 Stokes. Drifting codes within a stable coding scheme for working memory. *PLOS Biology*, 18  
794 (3):e3000625, 2020. ISSN 1545-7885. doi: 10.1371/journal.pbio.3000625.
- 795 [27] Vincent Di Lollo and Peter Dixon. Two forms of persistence in visual information processing.  
796 *Journal of Experimental Psychology: Human Perception and Performance*, 14(4):671–681, 1988.  
797 ISSN 1939-1277, 0096-1523. doi: 10.1037/0096-1523.14.4.671.
- 798 [28] George Sperling. The information available in brief visual presentations. *Psychological Mono-*  
799 *graphs: General and Applied*, 74(11):1–29, 1960. ISSN 0096-9753. doi: 10.1037/h0093759.

- 800 [29] Claire Bradley and Joel Pearson. The Sensory Components of High-Capacity Iconic Mem-  
801 ory and Visual Working Memory. *Frontiers in Psychology*, 3, 2012. ISSN 1664-1078. doi:  
802 10.3389/fpsyg.2012.00355.
- 803 [30] Michael S. Pratte. Iconic Memories Die a Sudden Death. *Psychological Science*, 29(6):877–887,  
804 2018. ISSN 0956-7976, 1467-9280. doi: 10.1177/0956797617747118.
- 805 [31] Ulric Neisser. *Cognitive Psychology*. Number 1966 in Century psychology series award.  
806 Appleton-Century-Crofts, New York, NY, 1967. ISBN 978-0-390-66509-6.
- 807 [32] Edmund T. Rolls and M.J. Tovee. Processing speed in the cerebral cortex and the neuro-  
808 physiology of visual masking. *Proceedings of the Royal Society of London. Series B: Biological*  
809 *Sciences*, 257(1348):9–15, 1994. ISSN 0962-8452, 1471-2954. doi: 10.1098/rspb.1994.0087.
- 810 [33] Rob R.M. Teeuwen, Catherine Wacogne, Ulf H. Schnabel, Matthew W. Self, and Pieter R.  
811 Roelfsema. A neuronal basis of iconic memory in macaque primary visual cortex. *Current*  
812 *Biology*, 31(24), 2021. ISSN 09609822. doi: 10.1016/j.cub.2021.09.052.
- 813 [34] Timo van Kerkoerle, Matthew W. Self, and Pieter R. Roelfsema. Layer-specificity in the effects  
814 of attention and working memory on activity in primary visual cortex. *Nature Communications*,  
815 8(1), 2017. ISSN 2041-1723. doi: 10.1038/ncomms13804.
- 816 [35] P. M. Bays, N. Gorgoraptis, N. Wee, L. Marshall, and M. Husain. Temporal dynamics of  
817 encoding, storage, and reallocation of visual working memory. *Journal of Vision*, 11(10):6–6,  
818 2011. ISSN 1534-7362. doi: 10.1167/11.10.6.
- 819 [36] Hitomi Shibuya and Claus Bundesen. Visual selection from multielement displays: Measuring  
820 and modeling effects of exposure duration. *Journal of Experimental Psychology: Human Per-*  
821 *ception and Performance*, 14(4):591–600, 1988. ISSN 1939-1277, 0096-1523. doi: 10.1037/0096-  
822 1523.14.4.591.
- 823 [37] Edward K. Vogel, Geoffrey F. Woodman, and Steven J. Luck. The time course of consolidation  
824 in visual working memory. *Journal of Experimental Psychology: Human Perception and Perfor-*  
825 *mance*, 32(6):1436–1451, 2006. ISSN 1939-1277, 0096-1523. doi: 10.1037/0096-1523.32.6.1436.
- 826 [38] Mehrdad Jazayeri and J Anthony Movshon. Optimal representation of sensory information  
827 by neural populations. *Nature Neuroscience*, 9(5):690–696, 2006. ISSN 1097-6256. doi:  
828 10.1038/nm1691.
- 829 [39] John H. Reynolds and David J. Heeger. The Normalization Model of Attention. *Neuron*, 61  
830 (2):168–185, 2009. ISSN 08966273. doi: 10.1016/j.neuron.2009.01.002.
- 831 [40] R. F. Hess and R. J. Snowden. Temporal properties of human visual filters: number, shapes and  
832 spatial covariation. *Vision Research*, 32(1):47–59, 1992. ISSN 0042-6989. doi: 10.1016/0042-  
833 6989(92)90112-v.
- 834 [41] A M Derrington and P Lennie. Spatial and temporal contrast sensitivities of neurones in  
835 lateral geniculate nucleus of macaque. *The Journal of Physiology*, 357(1):219–240, 1984. ISSN  
836 00223751. doi: 10.1113/jphysiol.1984.sp015498.
- 837 [42] B B Lee, P R Martin, and A Valberg. Sensitivity of macaque retinal ganglion cells to chromatic  
838 and luminance flicker. *The Journal of Physiology*, 414(1):223–243, 1989. ISSN 00223751. doi:  
839 10.1113/jphysiol.1989.sp017685.
- 840 [43] M. J. Hawken, R. M. Shapley, and D. H. Grosof. Temporal-frequency selectivity in mon-  
841 key visual cortex. *Visual Neuroscience*, 13(3):477–492, 1996. ISSN 0952-5238. doi:  
842 10.1017/s0952523800008154.
- 843 [44] J. R. Müller, A. B. Metha, J. Krauskopf, and P. Lennie. Information conveyed by onset tran-  
844 sients in responses of striate cortical neurons. *The Journal of Neuroscience: The Official Journal*  
845 *of the Society for Neuroscience*, 21(17):6978–6990, 2001. ISSN 1529-2401.
- 846 [45] M. W. Oram and D. I. Perrett. Time course of neural responses discriminating different views of  
847 the face and head. *Journal of Neurophysiology*, 68(1):70–84, 1992. ISSN 0022-3077, 1522-1598.  
848 doi: 10.1152/jn.1992.68.1.70.

- 849 [46] Yiu Fai Sit, Yuzhi Chen, Wilson S. Geisler, Risto Miikkulainen, and Eyal Seidemann. Complex  
850 Dynamics of V1 Population Responses Explained by a Simple Gain-Control Model. *Neuron*, 64  
851 (6):943–956, 2009. ISSN 08966273. doi: 10.1016/j.neuron.2009.08.041.
- 852 [47] G. Kovacs, R. Vogels, and G. A. Orban. Cortical correlate of pattern backward masking.  
853 *Proceedings of the National Academy of Sciences*, 92(12):5587–5591, 1995. ISSN 0027-8424,  
854 1091-6490. doi: 10.1073/pnas.92.12.5587.
- 855 [48] M. T. Turvey. On peripheral and central processes in vision: Inferences from an information-  
856 processing analysis of masking with patterned stimuli. *Psychological Review*, 80(1):1–52, 1973.  
857 ISSN 1939-1471, 0033-295X. doi: 10.1037/h0033872.
- 858 [49] E. Aksay, G. Gamkrelidze, H. S. Seung, R. Baker, and D. W. Tank. In vivo intracellular  
859 recording and perturbation of persistent activity in a neural integrator. *Nature Neuroscience*,  
860 4(2):184–193, 2001. ISSN 1097-6256. doi: 10.1038/84023.
- 861 [50] A. Compte, N. Brunel, P. S. Goldman-Rakic, and X. J. Wang. Synaptic mechanisms and  
862 network dynamics underlying spatial working memory in a cortical network model. *Cerebral*  
863 *Cortex (New York, N.Y.: 1991)*, 10(9):910–923, 2000. ISSN 1047-3211.
- 864 [51] Max Coltheart. Iconic memory and visible persistence. *Perception & Psychophysics*, 27(3):  
865 183–228, 1980. ISSN 0031-5117, 1532-5962. doi: 10.3758/BF03204258.
- 866 [52] Klaus Oberauer. Removal of irrelevant information from working memory: sometimes fast,  
867 sometimes slow, and sometimes not at all: Removal of irrelevant information from working  
868 memory. *Annals of the New York Academy of Sciences*, 1424(1):239–255, 2018. ISSN 00778923.  
869 doi: 10.1111/nyas.13603.
- 870 [53] W. E. Hick. On the Rate of Gain of Information. *Quarterly Journal of Experimental Psychology*,  
871 4(1):11–26, 1952. ISSN 0033-555X. doi: 10.1080/17470215208416600.
- 872 [54] Shui-I Shih and George Sperling. Measuring and modeling the trajectory of visual spatial  
873 attention. *Psychological Review*, 109(2):260–305, 2002. ISSN 1939-1471, 0033-295X. doi:  
874 10.1037/0033-295X.109.2.260.
- 875 [55] Flora Bouchacourt and Timothy J. Buschman. A Flexible Model of Working Memory. *Neuron*,  
876 103(1):147–160.e8, 2019. ISSN 08966273. doi: 10.1016/j.neuron.2019.04.020.
- 877 [56] Jessica M.V. McMaster, Ivan Tomić, Sebastian Schneegans, and Paul M. Bays. Swap errors  
878 in visual working memory are fully explained by cue-feature variability. *Cognitive Psychology*,  
879 137:101493, 2022. ISSN 00100285. doi: 10.1016/j.cogpsych.2022.101493.
- 880 [57] Ivan Tomić, Zahara Girones, Máté Lengyel, and Paul M. Bays. Effects of retention interval on  
881 stimulus-specific biases in visual working memory. preprint, in prep.
- 882 [58] Rainer Doost and M. T. Turvey. Iconic memory and central processing capacity. *Perception &*  
883 *Psychophysics*, 9(3):269–274, 1971. ISSN 0031-5117, 1532-5962. doi: 10.3758/BF03212646.
- 884 [59] Onur Ozan Koyluoglu, Yoni Pertzov, Sanjay Manohar, Masud Husain, and Ila R Fiete. Funda-  
885 mental bound on the persistence and capacity of short-term memory stored as graded persistent  
886 activity. *eLife*, 6, 2017. ISSN 2050-084X. doi: 10.7554/eLife.22225.
- 887 [60] George Sperling. A Brief Overview of Computational Models of Spatial, Temporal, and Fea-  
888 ture Visual Attention. In Thomas Lachmann and Tina Weis, editors, *Invariances in Human*  
889 *Information Processing*, pages 143–182. Routledge, New York, 2018.
- 890 [61] Martin Boerlin and Sophie Denève. Spike-Based Population Coding and Working Mem-  
891 ory. *PLoS Computational Biology*, 7(2):e1001080, 2011. ISSN 1553-7358. doi: 10.1371/jour-  
892 nal.pcbi.1001080.
- 893 [62] Jeffrey M. Beck, Wei Ji Ma, Roozbeh Kiani, Tim Hanks, Anne K. Churchland, Jamie Roit-  
894 man, Michael N. Shadlen, Peter E. Latham, and Alexandre Pouget. Probabilistic Population  
895 Codes for Bayesian Decision Making. *Neuron*, 60(6):1142–1152, 2008. ISSN 08966273. doi:  
896 10.1016/j.neuron.2008.09.021.

- 897 [63] Geoffrey R. Loftus, Janine Duncan, and Paul Gehrig. On the time course of perceptual in-  
898 formation that results from a brief visual presentation. *Journal of Experimental Psychology:*  
899 *Human Perception and Performance*, 18(2):530–549, 1992. ISSN 1939-1277, 0096-1523. doi:  
900 10.1037/0096-1523.18.2.530.
- 901 [64] Z.-L. Lu, J. Neuse, S. Madigan, and B. A. Doshier. Fast decay of iconic memory in observers  
902 with mild cognitive impairments. *Proceedings of the National Academy of Sciences*, 102(5):  
903 1797–1802, 2005. ISSN 0027-8424, 1091-6490. doi: 10.1073/pnas.0408402102.
- 904 [65] Timothy J. Ricker, Lauren R. Spiegel, and Nelson Cowan. Time-based loss in visual short-term  
905 memory is from trace decay, not temporal distinctiveness. *Journal of Experimental Psychology:*  
906 *Learning, Memory, and Cognition*, 40(6):1510–1523, 2014. ISSN 1939-1285, 0278-7393. doi:  
907 10.1037/xlm0000018.
- 908 [66] Hongsup Shin, Qijia Zou, and Wei Ji Ma. The effects of delay duration on visual working mem-  
909 ory for orientation. *Journal of Vision*, 17(14):10, 2017. ISSN 1534-7362. doi: 10.1167/17.14.10.
- 910 [67] Weiwei Zhang and Steven J. Luck. Sudden Death and Gradual Decay in Visual Work-  
911 ing Memory. *Psychological Science*, 20(4):423–428, 2009. ISSN 0956-7976, 1467-9280. doi:  
912 10.1111/j.1467-9280.2009.02322.x.
- 913 [68] Carlos D Brody, Ranulfo Romo, and Adam Kepecs. Basic mechanisms for graded persistent ac-  
914 tivity: discrete attractors, continuous attractors, and dynamic representations. *Current Opinion*  
915 *in Neurobiology*, 13(2):204–211, 2003. ISSN 09594388. doi: 10.1016/S0959-4388(03)00050-3.
- 916 [69] Mikail Khona and Ila R. Fiete. Attractor and integrator networks in the brain. *Nature Reviews*  
917 *Neuroscience*, 23(12):744–766, 2022. ISSN 1471-003X, 1471-0048. doi: 10.1038/s41583-022-  
918 00642-0.
- 919 [70] Sanjeev B. Khanna, Adam C. Snyder, and Matthew A. Smith. Distinct Sources of Variability  
920 Affect Eye Movement Preparation. *The Journal of Neuroscience*, 39(23):4511–4526, 2019. ISSN  
921 0270-6474, 1529-2401. doi: 10.1523/JNEUROSCI.2329-18.2019.
- 922 [71] M. H. Chang, K. M. Armstrong, and T. Moore. Dissociation of Response Variability from  
923 Firing Rate Effects in Frontal Eye Field Neurons during Visual Stimulation, Working Memory,  
924 and Attention. *Journal of Neuroscience*, 32(6):2204–2216, 2012. ISSN 0270-6474, 1529-2401.  
925 doi: 10.1523/JNEUROSCI.2967-11.2012.
- 926 [72] Martin Rolfs and Richard Schweitzer. Coupling perception to action through incidental sensory  
927 consequences of motor behaviour. *Nature Reviews Psychology*, 1(2):112–123, 2022. ISSN 2731-  
928 0574. doi: 10.1038/s44159-021-00015-x.
- 929 [73] Claus Bundesen. A theory of visual attention. *Psychological Review*, 97(4):523–547, 1990. ISSN  
930 1939-1471, 0033-295X. doi: 10.1037/0033-295X.97.4.523.
- 931 [74] George Sperling and Erich Weichselgartner. Episodic theory of the dynamics of spatial attention.  
932 *Psychological Review*, 102(3):503–532, 1995. ISSN 1939-1471, 0033-295X. doi: 10.1037/0033-  
933 295X.102.3.503.
- 934 [75] Philip L. Smith and Roger Ratcliff. An integrated theory of attention and decision making  
935 in visual signal detection. *Psychological Review*, 116(2):283–317, 2009. ISSN 1939-1471, 0033-  
936 295X. doi: 10.1037/a0015156.
- 937 [76] Klaus Oberauer and Reinhold Kliegl. A formal model of capacity limits in working mem-  
938 ory. *Journal of Memory and Language*, 55(4):601–626, 2006. ISSN 0749596X. doi:  
939 10.1016/j.jml.2006.08.009.
- 940 [77] M. Usher and J. L. McClelland. The time course of perceptual choice: the leaky, compet-  
941 ing accumulator model. *Psychological Review*, 108(3):550–592, 2001. ISSN 0033-295X. doi:  
942 10.1037/0033-295x.108.3.550.
- 943 [78] David K. Sewell, Simon D. Lilburn, and Philip L. Smith. An information capacity limitation  
944 of visual short-term memory. *Journal of Experimental Psychology: Human Perception and*  
945 *Performance*, 40(6):2214–2242, 2014. ISSN 1939-1277, 0096-1523. doi: 10.1037/a0037744.



- 946 [79] T. J. Buschman, M. Siegel, J. E. Roy, and E. K. Miller. Neural substrates of cognitive capacity  
947 limitations. *Proceedings of the National Academy of Sciences*, 108(27):11252–11255, 2011. ISSN  
948 0027-8424, 1091-6490. doi: 10.1073/pnas.1104666108.
- 949 [80] Thomas C. Sprague, Edward F. Ester, and John T. Serences. Reconstructions of Information  
950 in Visual Spatial Working Memory Degrade with Memory Load. *Current Biology*, 24(18):  
951 2174–2180, 2014. ISSN 09609822. doi: 10.1016/j.cub.2014.07.066.
- 952 [81] Robert Taylor and Paul M. Bays. Theory of neural coding predicts an upper bound on estimates  
953 of memory variability. *Psychological Review*, 127(5):700–718, 2020. ISSN 1939-1471, 0033-295X.  
954 doi: 10.1037/rev0000189.
- 955 [82] Nikolaus Kriegeskorte and Xue-Xin Wei. Neural tuning and representational geometry. *Nature*  
956 *Reviews Neuroscience*, pages 1–16, 2021. ISSN 1471-0048. doi: 10.1038/s41583-021-00502-3.
- 957 [83] Ariel Zylberberg, Stanislas Dehaene, Gabriel B. Mindlin, and Mariano Sigman. Neurophysio-  
958 logical bases of exponential sensory decay and top-down memory retrieval: a model. *Frontiers*  
959 *in Computational Neuroscience*, 3, 2009. ISSN 16625188. doi: 10.3389/neuro.10.004.2009.
- 960 [84] Qing Yu, Matthew F. Panichello, Ying Cai, Bradley R. Postle, and Timothy J. Buschman.  
961 Delay-period activity in frontal, parietal, and occipital cortex tracks noise and biases in visual  
962 working memory. *PLOS Biology*, 18(9):e3000854, 2020. ISSN 1545-7885. doi: 10.1371/jour-  
963 nal.pbio.3000854.
- 964 [85] Rosanne L. Rademaker, Chaipat Chunharas, and John T. Serences. Coexisting representations  
965 of sensory and mnemonic information in human visual cortex. *Nature Neuroscience*, 22(8):  
966 1336–1344, 2019. ISSN 1097-6256, 1546-1726. doi: 10.1038/s41593-019-0428-x.
- 967 [86] John T. Serences. Neural mechanisms of information storage in visual short-term memory.  
968 *Vision Research*, 128:53–67, 2016. ISSN 00426989. doi: 10.1016/j.visres.2016.09.010.
- 969 [87] Yaoda Xu. Reevaluating the Sensory Account of Visual Working Memory Storage. *Trends in*  
970 *Cognitive Sciences*, 2017. ISSN 13646613. doi: 10.1016/j.tics.2017.06.013.
- 971 [88] P.S Goldman-Rakic. Cellular basis of working memory. *Neuron*, 14(3):477–485, 1995. ISSN  
972 08966273. doi: 10.1016/0896-6273(95)90304-6.
- 973 [89] Katherine C Bettencourt and Yaoda Xu. Decoding the content of visual short-term memory  
974 under distraction in occipital and parietal areas. *Nature Neuroscience*, 19(1):150–157, 2016.  
975 ISSN 1097-6256, 1546-1726. doi: 10.1038/nn.4174.
- 976 [90] Stephenie A. Harrison and Frank Tong. Decoding reveals the contents of visual working memory  
977 in early visual areas. *Nature*, 458(7238):632–635, 2009. ISSN 0028-0836, 1476-4687. doi:  
978 10.1038/nature07832.
- 979 [91] Thomas B. Christophel, Polina Iamshchinina, Chang Yan, Carsten Allefeld, and John-Dylan  
980 Haynes. Cortical specialization for attended versus unattended working memory. *Nature Neu-*  
981 *roscience*, 2018. ISSN 1097-6256, 1546-1726. doi: 10.1038/s41593-018-0094-4.
- 982 [92] P. M. Bays, R. F. G. Catalao, and M. Husain. The precision of visual working memory is set  
983 by allocation of a shared resource. *Journal of Vision*, 9(10):7–7, 2009. ISSN 1534-7362. doi:  
984 10.1167/9.10.7.
- 985 [93] Laura Rerko, Klaus Oberauer, and Hsuan-Yu Lin. Spatial transposition gradients in visual  
986 working memory. *The Quarterly Journal of Experimental Psychology*, 67(1):3–15, 2014. ISSN  
987 1747-0218, 1747-0226. doi: 10.1080/17470218.2013.789543.
- 988 [94] Eckart Zimmermann, M. Concetta Morrone, and David C. Burr. Spatial position information  
989 accumulates steadily over time. *The Journal of Neuroscience: The Official Journal of the Society*  
990 *for Neuroscience*, 33(47):18396–18401, 2013. ISSN 1529-2401. doi: 10.1523/JNEUROSCI.1864-  
991 13.2013.
- 992 [95] Melonie Williams, Sang W. Hong, Min-Suk Kang, Nancy B. Carlisle, and Geoffrey F. Woodman.  
993 The benefit of forgetting. *Psychonomic Bulletin & Review*, 20(2):348–355, 2013. ISSN 1069-  
994 9384, 1531-5320. doi: 10.3758/s13423-012-0354-3.

- 995 [96] Joshua J. LaRocque, Jarrod A. Lewis-Peacock, Andrew T. Drysdale, Klaus Oberauer, and  
996 Bradley R. Postle. Decoding Attended Information in Short-term Memory: An EEG Study.  
997 *Journal of Cognitive Neuroscience*, 25(1):127–142, 2013. ISSN 0898-929X, 1530-8898.
- 998 [97] Robert Taylor, Ivan Tomić, David Aagten-Murphy, and Paul M. Bays. Working memory is  
999 updated by reallocation of resources from obsolete to new items. *Attention, Perception, &*  
1000 *Psychophysics*, 2022. ISSN 1943-3921, 1943-393X. doi: 10.3758/s13414-022-02584-2.
- 1001 [98] D. H. Kelly and E. Martinez-Uriegas. Measurements of chromatic and achromatic afterimages.  
1002 *Journal of the Optical Society of America. A, Optics and Image Science*, 10(1):29–37, 1993.  
1003 ISSN 0740-3232.
- 1004 [99] Naotsugu Tsuchiya and Christof Koch. Continuous flash suppression reduces negative af-  
1005 terimages. *Nature Neuroscience*, 8(8):1096–1101, 2005. ISSN 1097-6256, 1546-1726. doi:  
1006 10.1038/nn1500.
- 1007 [100] Cajo J. F. Ter Braak. A Markov Chain Monte Carlo version of the genetic algorithm Differential  
1008 Evolution: easy Bayesian computing for real parameter spaces. *Statistics and Computing*, 16  
1009 (3):239–249, 2006. ISSN 0960-3174, 1573-1375. doi: 10.1007/s11222-006-8769-1.

## 1010 Supplementary information

### 1011 Methods

#### 1012 Participants

1013 A total of twenty-three naive observers (12 females, 11 males; aged 18–34) took part in the study after  
1014 giving informed consent in accordance with the Declaration of Helsinki. Ten observers participated in  
1015 Experiment 1 and thirteen observers participated in Experiment 2. Volunteers were recruited through  
1016 the Cambridge Psychology research sign-up system. All observers reported normal color vision and  
1017 normal or corrected-to-normal visual acuity, and were remunerated £10/hr for their participation.

#### 1018 General methods

1019 **Experimental setup.** Stimuli were presented on a 69 cm gamma-corrected LCD monitor with a  
1020 refresh rate of 144 Hz. Participants were seated in a dark room and viewed the monitor at a distance  
1021 of 60 cm, with their head supported by a forehead and chin rest. Responses were collected using  
1022 Magic Trackpad 2, a pointing device (16 x 11.5 cm) with a tactile sensor operating at ~90 Hz (Apple  
1023 Inc.). Eye position was monitored online at 1000 Hz using an infrared eye tracker (SR Research).  
1024 Stimulus presentation and response registration were controlled by a script written in Psychtoolbox  
1025 and run using Matlab (The Mathworks Inc.).

1026  
1027 **Stimuli.** Memory stimuli consisted of randomly oriented Gabor patches (wavelength of the sinusoid,  
1028  $0.65^\circ$  of visual angle; s.d. of Gaussian envelope,  $0.5^\circ$ ) presented on a uniform mid-grey background.  
1029 The contrast of Gabor patches varied between experiments (see below). Memory stimulus positions  
1030 were randomly chosen from a set of ten equidistant locations on the perimeter of an invisible circle  
1031 with radius  $6^\circ$  centered at fixation. At the start of each trial, a black fixation annulus was shown  
1032 ( $r = 0.15^\circ$  and  $R = 0.25^\circ$ ) in the display center. Once steady fixation was registered, the size of  
1033 the inner radius increased ( $r = 0.2^\circ$ ). Observers perceived this change as the annulus becoming  
1034 thinner. The fixation annulus then stayed visible throughout the trial. Items were cued for recall by  
1035 displaying a black arrow ( $2^\circ$  length) extending from the center of the display and pointing to one of  
1036 the previously occupied locations without overlapping with it.

1037  
1038 **Procedure.** Each trial started with presentation of the central fixation annulus. Observers were  
1039 required to maintain gaze fixation for 500 ms within a radius of  $2^\circ$  around the central annulus  
1040 in order for a trial to proceed. Following stable fixation, the appearance of the fixation annulus  
1041 changed, indicating that the memory array would appear in 500 ms. The memory sample array  
1042 consisting of 1, 4, or 10 randomly oriented Gabor patches was then presented. This was followed by  
1043 a delay period and finally a cue display, indicating to observers to report the memorized orientation  
1044 of an item previously displayed at the indicated location.

1045  
1046 Observers were instructed to reproduce the remembered orientation as accurately and as quickly as  
1047 possible by executing a single movement of their index fingertip over the surface of the touchpad  
1048 located centrally in front of them. Simultaneously with the observer's movement, a blue line appeared  
1049 on the screen, extending from the center of the screen and mimicking the observer's response in  
1050 real-time. The response was terminated if one of the following conditions was satisfied: the observer  
1051 stopped movement for 500 ms; the observer lifted their finger from the touchpad; or the response  
1052 line reached the edge of the display. This was followed by a feedback display, consisting of the actual  
1053 orientation (shown with a white line) and reported orientation (shown with a blue line) overlaid  
1054 at the location of the cued item. The recalled orientation was calculated as the angle of the line  
1055 connecting a starting point and an endpoint of hand movement on the touchpad.

1056  
1057 Observers were required to maintain central fixation during the stimulus presentation and delay  
1058 phase. If gaze position deviated by more than  $2^\circ$  a message appeared on the screen, and the trial  
1059 was aborted and restarted with newly randomized orientations. Participants completed the task in  
1060 blocks of 50 trials, and each block corresponded to one experimental condition. The order of blocks  
1061 was randomized for every observer. At the beginning of the testing session observers familiarized  
1062 themselves with the task and experimental setup by doing at most 50 practice trials.

1063

## 1064 Experiment 1

1065 In Experiment 1 we investigated the temporal dynamics of VWM fidelity over short delays by  
1066 presenting observers with sets of stimuli of variable size and then cueing one of them for recall  
1067 after a variable delay relative to the stimuli offset. A typical trial sequence is shown in Figure  
1068 S1A. The memory sample array (Michelson contrast = 0.5) was presented for 200 ms. In 50% of  
1069 trials, the stimuli changed phase (by 180°) and contrast (Michelson contrast = 1) for the last 50  
1070 ms of presentation, while remaining at the same orientation. This manipulation was intended to  
1071 minimize retinal after-effects (see e.g. 98 for similar techniques). The stimuli offset was followed by a  
1072 variable blank delay of 0, 100, 200, 400, or 1000 ms, after which one item was cued for recall. In one  
1073 additional condition, the cue was instead presented simultaneously with the memory sample array,  
1074 indicating an item while it was still visible on the screen (Fig. S1B).

1075

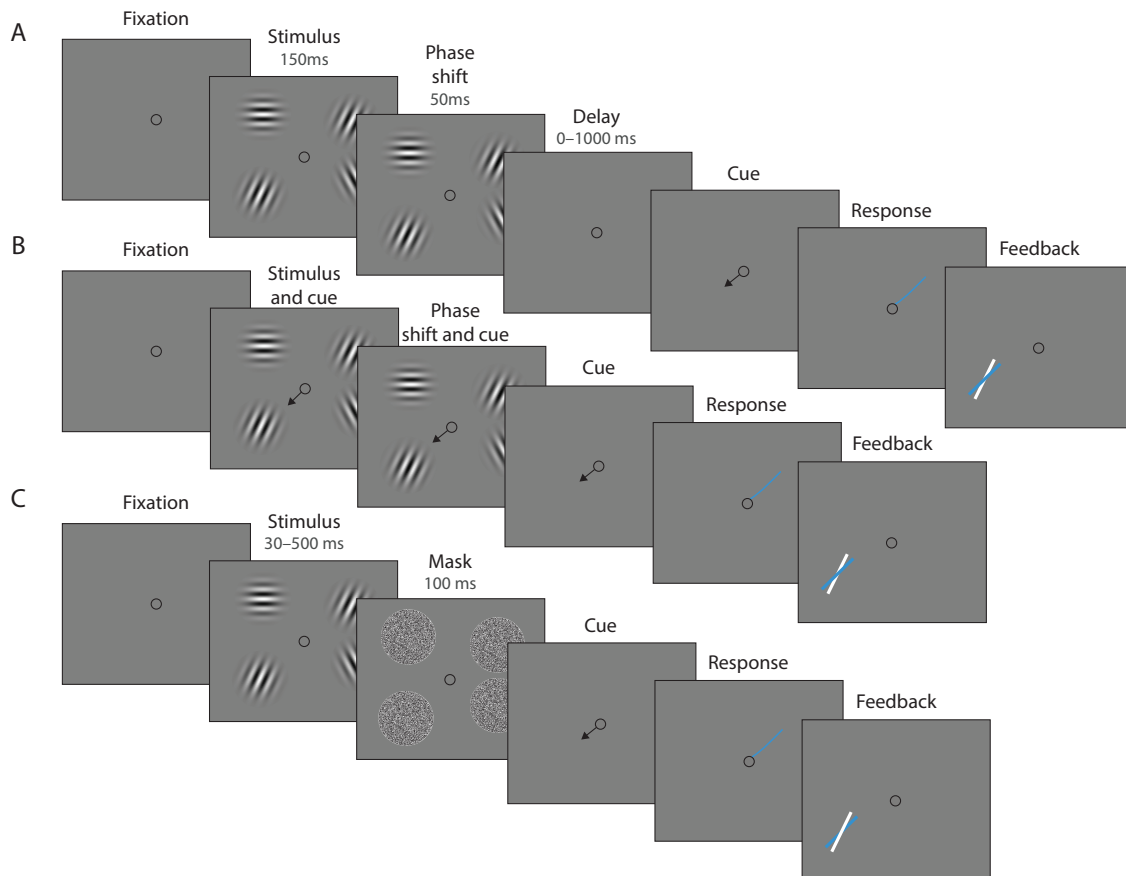

Figure S1: Experimental procedure. (A) Experiment 1. On each trial, a memory array was presented consisting of 1, 4, or 10 randomly oriented Gabor stimuli. In 50% of all trials, the stimuli underwent a change of phase and contrast towards the end of the exposure period intended to minimize retinal aftereffects. After a variable delay, an arrow cue was shown pointing towards the location of one stimulus from the preceding array. Observers reported the remembered orientation of the cued stimulus by swiping their index finger on the touchpad. The response was followed by feedback showing the true orientation. (B) In a proportion of trials, the cue was presented simultaneously with the stimuli. (C) Experiment 2. On each trial a memory array consisting of 1, 4, or 10 randomly oriented Gabors was presented for a variable duration, and followed by a white noise flickering mask. The mask was replaced by an arrow cue pointing towards the location of one stimulus from the preceding array. Observers reported its remembered orientation and received feedback as in Experiment 1. Stimuli are not drawn to scale.

1076 Each observer completed a total of 1800 trials, split into 36 blocks. The experiment was organized  
1077 such that half of the observers first completed 18 blocks with phase shift (see above), and the  
1078 other half first completed blocks without phase shift. Except for this constraint, block order was

1079 randomized for every observer. The testing was divided into four equal testing sessions, each lasting  
1080 approximately 1.5 hours, with a separation of at least one day between sessions.

1081

## 1082 **Experiment 2**

1083 In Experiment 2 we investigated the temporal dynamics of VWM fidelity during encoding. To this  
1084 end, we displayed oriented stimuli for a variable duration and in sets of variable size. The experiment  
1085 was similar to the previous experiment with a few exceptions (Fig. S1C). Each trial started with  
1086 a presentation of a fixation annulus, followed by a memory array (Michelson contrast = 0.3). The  
1087 stimuli stayed on the screen for a variable duration of 30, 48, 77, 122, 196, 313, or 500 ms, and  
1088 were then replaced by noise masks (100 ms). Mask stimuli consisted of white noise at full contrast,  
1089 windowed with a Gaussian envelope ( $0.5^\circ$  s.d.) and flickering at 35 Hz. At the offset of the masking  
1090 stimuli, one memory item was cued for recall. Each observer completed 21 blocks, for a total of 1050  
1091 trials. Blocks were spread over two testing sessions, each lasting approximately 1.5 hours, and taking  
1092 place on different days. Observers completed 10 blocks in the first, and the remaining 11 blocks in  
1093 the second session.

1094

## 1095 Minimizing retinal after-effects

1096 We assessed the method of minimizing retinal afterimages by repeating all measurements, with the  
 1097 exception of not using phase shift of stimuli (Fig S1A). We predicted retinal afterimages could serve  
 1098 as an additional source of information, but only for a brief period after stimuli offset. Therefore,  
 1099 here we expected to see better performance for brief delays compared to conditions with phase shift.  
 1100 Figure S2A shows recall error increased with both set size and delay. Both of these effects were  
 1101 statistically significant, as well as their interaction (set size:  $F_{(2,18)} = 47.3, p < .001, \eta^2 = .31$ ; delay  
 1102 time:  $F_{(5,45)} = 48.4, p < .001, \eta^2 = .26$ ; interaction:  $F_{(10,90)} = 21.3, p < .001, \eta^2 = .14$ ), reminiscent  
 1103 of findings for data with phase shift.

1104  
 1105 Next, we focused on the comparison of conditions with and without phase shift of stimuli (Fig S2B).  
 1106 We illustrate the difference in performance by subtracting RMSE obtained in the condition without  
 1107 phase shift (Fig 3B) from RMSE shown in Figure S2A. Negative values indicate better performance  
 1108 in a condition without phase shift. As predicted, the overall pattern of data suggested performance  
 1109 was comparable for 1 item across all delays, and for all set sizes for extreme delays (simultaneous  
 1110 presentation and 1000 ms), indicated by the difference values around 0. We confirmed the difference  
 1111 in recall error for 1 item across all delays did not differ consistently with and without phase shift, as  
 1112 neither phase shift ( $F_{(1,9)} = 0.03, p = .86, \eta^2 < .001, BF_{incl} = 0.143$ ) nor the interaction of phase shift  
 1113 and delay ( $F_{(5,45)} = 0.41, p = .89, \eta^2 = .00, BF_{incl} = 0.042$ ) reached significance. Based on this result,  
 1114 we conducted all remaining analyses using only the remaining two set sizes. We ran separate repeated  
 1115 measures ANOVAs for each delay using phase shift and set size as factors. The pattern of results we  
 1116 observed was clear: performance was comparable with and without phase shift with the simultaneous  
 1117 presentation and 1000 ms delay (phase shift,  $F_{(1,9)} \leq 1.08, p \geq .33, \eta^2 \leq .002, BF_{excl} \geq 3.62$ ; interac-  
 1118 tion,  $F_{(2,18)} \leq 0.8, p \geq .44, \eta^2 \leq .02, BF_{excl} \geq 3.39$ ), while for the remaining intermediate delays recall  
 1119 error was consistently lower when phase shift was omitted (phase shift,  $F_{(1,9)} \geq 5.8, p \leq .039, \eta^2 \geq .06$ ;  
 1120 interaction,  $F_{(1,9)} \leq 2.8, p \geq .13, \eta^2 \leq .001$ ).

1121

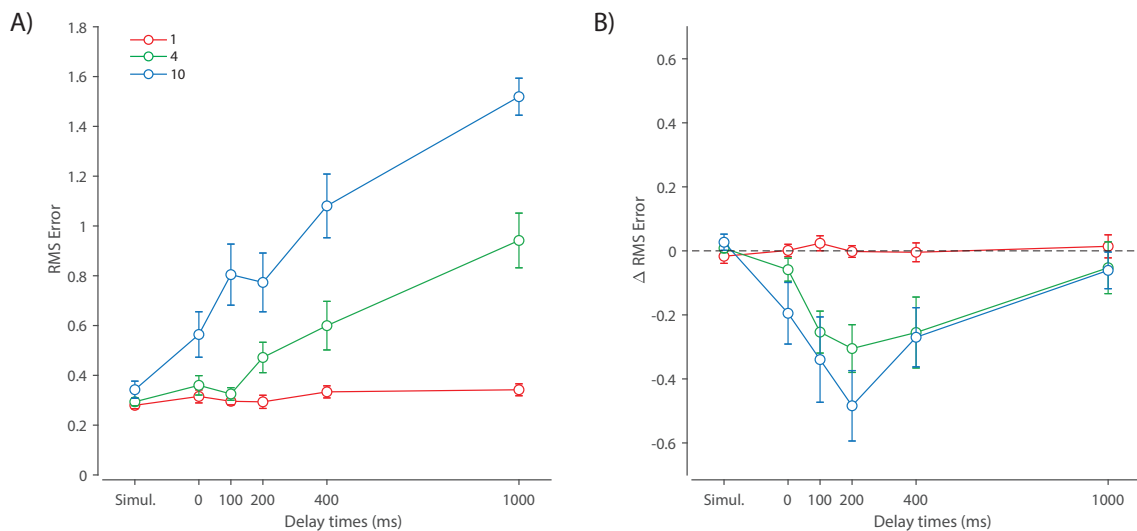

Figure S2: (A) Experiment 1 RMSE for trials without phase shift. (B) Differences in RMSE between trials with and without phase shift across set size and delay conditions. Negative values indicate better performance in the condition without phase shift.

1122 Taken together, performance with and without phase shift of stimuli was comparable in perceptual  
 1123 condition (simultaneous presentation) and with the longest delay, suggesting phase shift did not  
 1124 change visibility or encoding of information into VWM. In contrast, we found strong evidence that  
 1125 observers had access to an additional source of information over intermediate delays when phase shift  
 1126 was not used, demonstrated by a better recall performance from 0 ms to 400 ms delay. Specifically,  
 1127 this source of information was available immediately after stimuli offset and was short-lived, consistent  
 1128 with the theoretical description of retinal afterimages [99].

## 1129 Swap error estimates

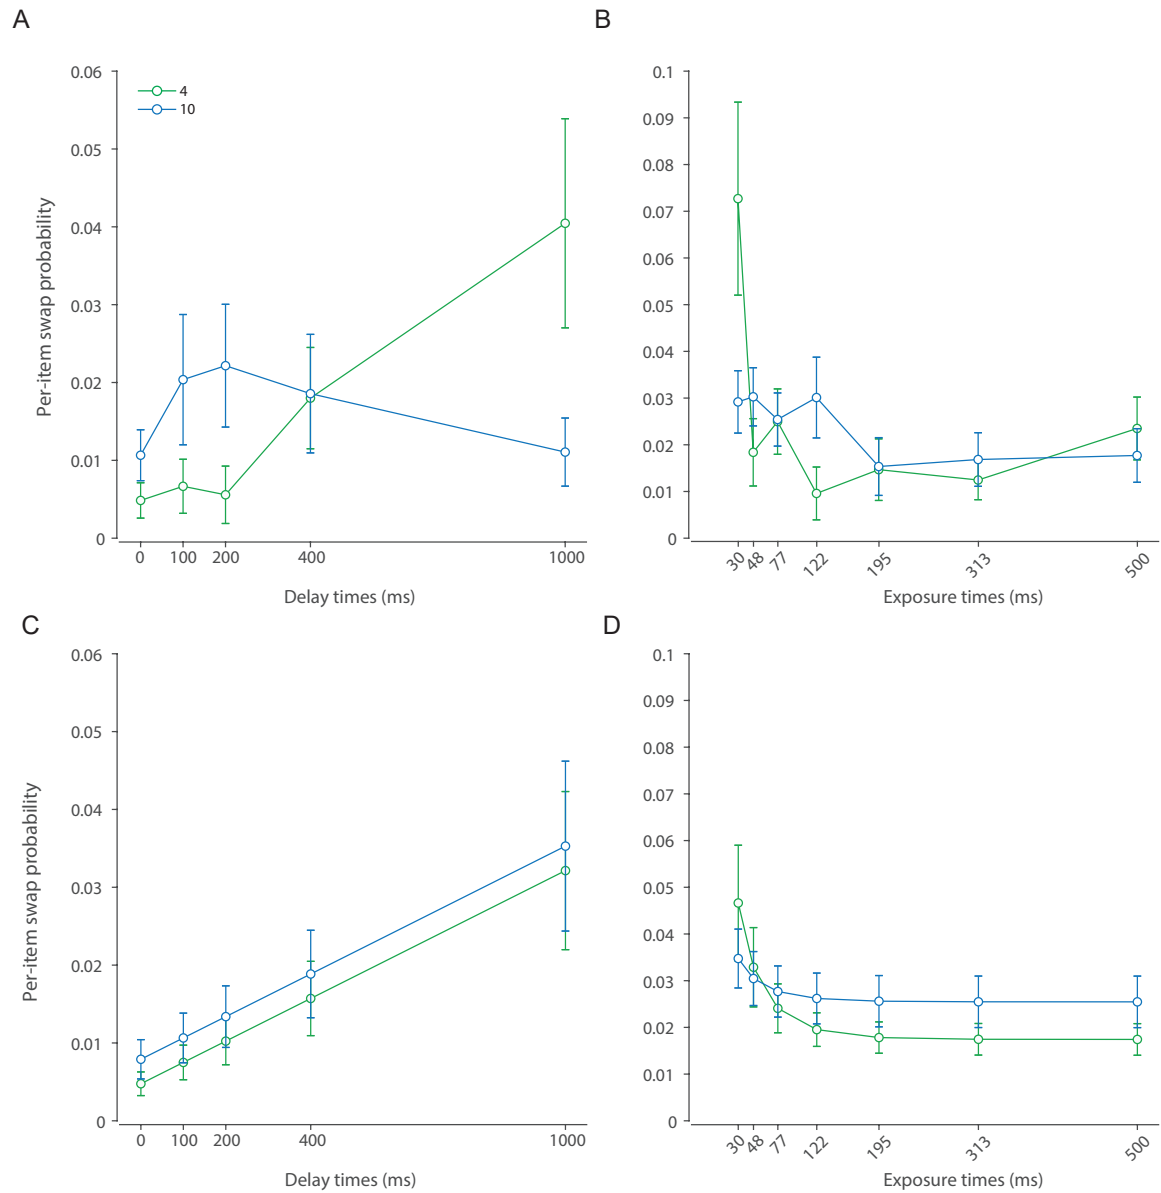

Figure S3: Swap error estimates. (A&B) Probability of swap errors estimated from empirical data using the three-component mixture model [92] in Experiment 1 (A) and Experiment 2 (B). (C&D) Probability of swap errors in best-fitting DyNR model in Experiment 1 (C) and Experiment 2 (D).

1130 **Alternative models' fits**

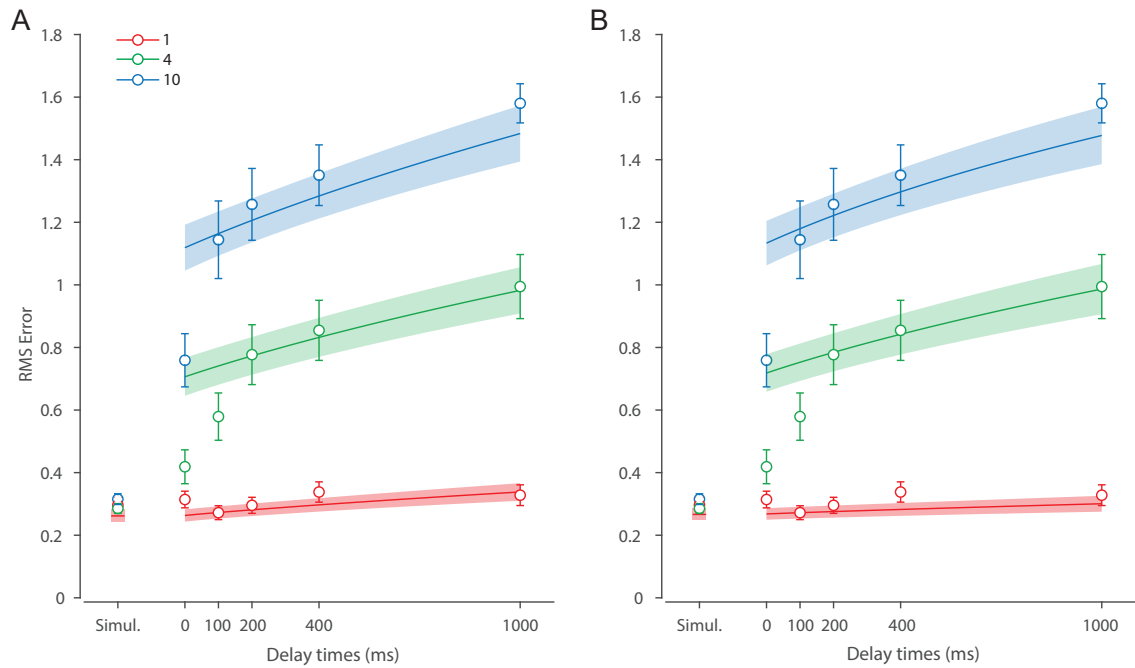

Figure S4: Experiment 1 behavioral data and model fit for the DyNR model without sensory persistence after stimulus offset. **(A)** A version of the DyNR model with equal diffusion across set sizes. **(B)** A version of the DyNR model with diffusion that scales with set size.

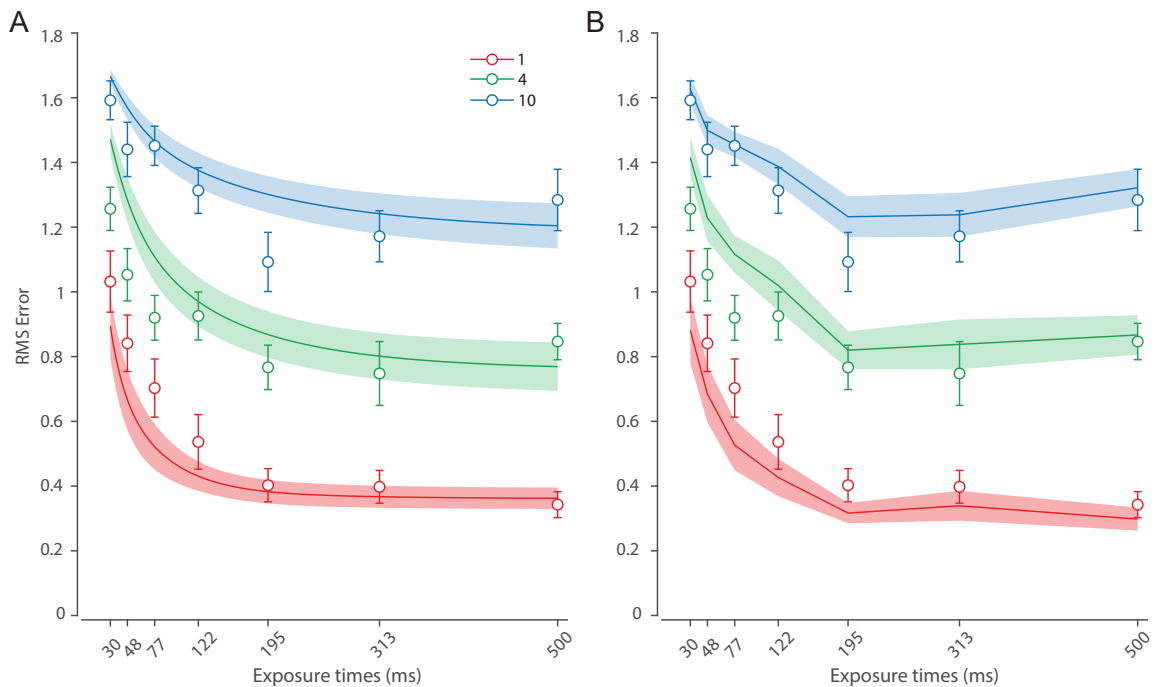

Figure S5: Experiment 2 behavioral data and model fit for the neural model without sensory persistence after stimulus offset. **(A)** A version of the DyNR model without sensory persistence. **(B)** Separate fits of the simplified neural model to each exposure time.



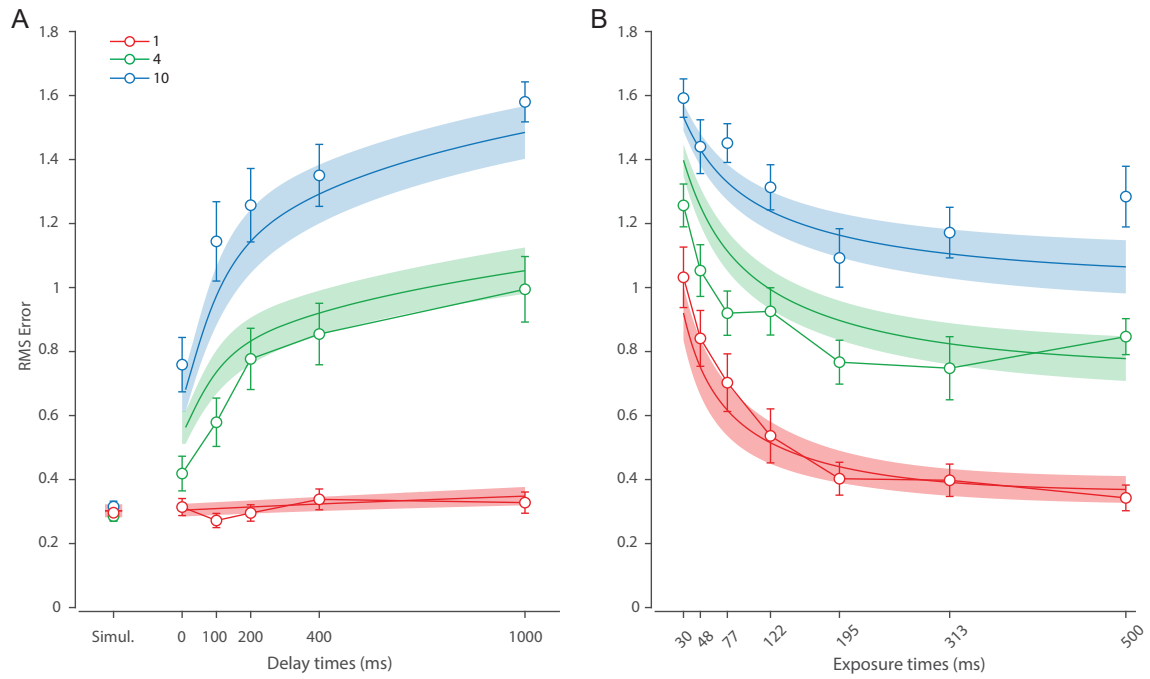

Figure S6: Behavioral data and model fit for the DyNR model without the cue processing time for (A) Experiment 1 and (B) Experiment 2.

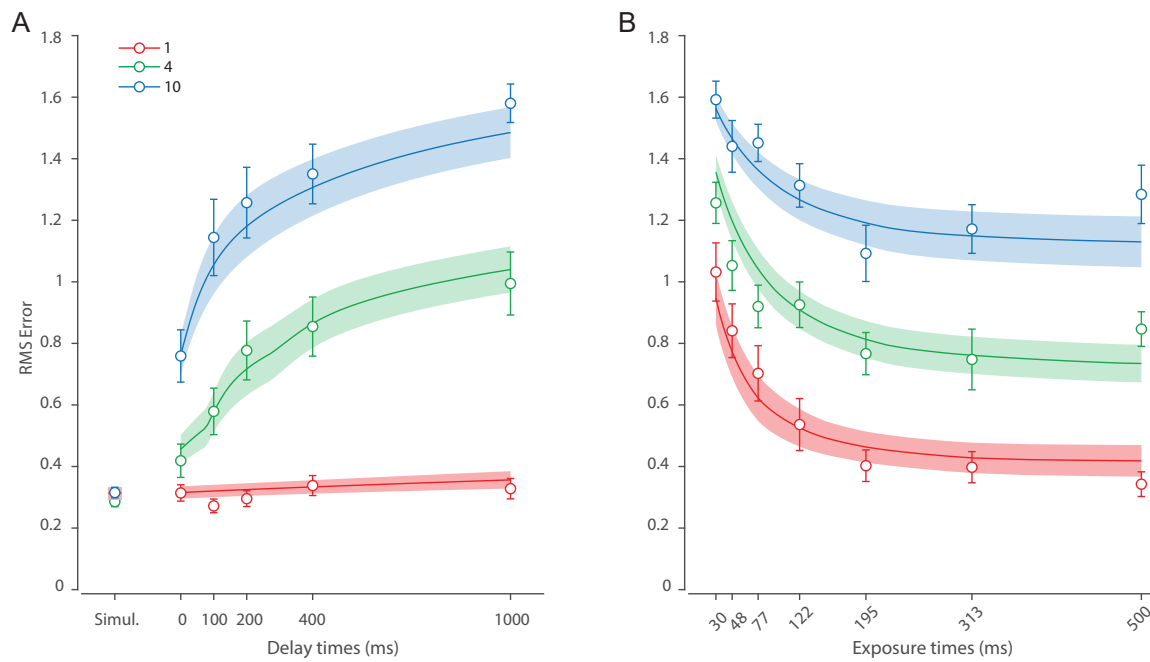

Figure S7: Behavioral data and model fit for a neural model with constant accumulation of information into WM for (A) Experiment 1 and (B) Experiment 2.

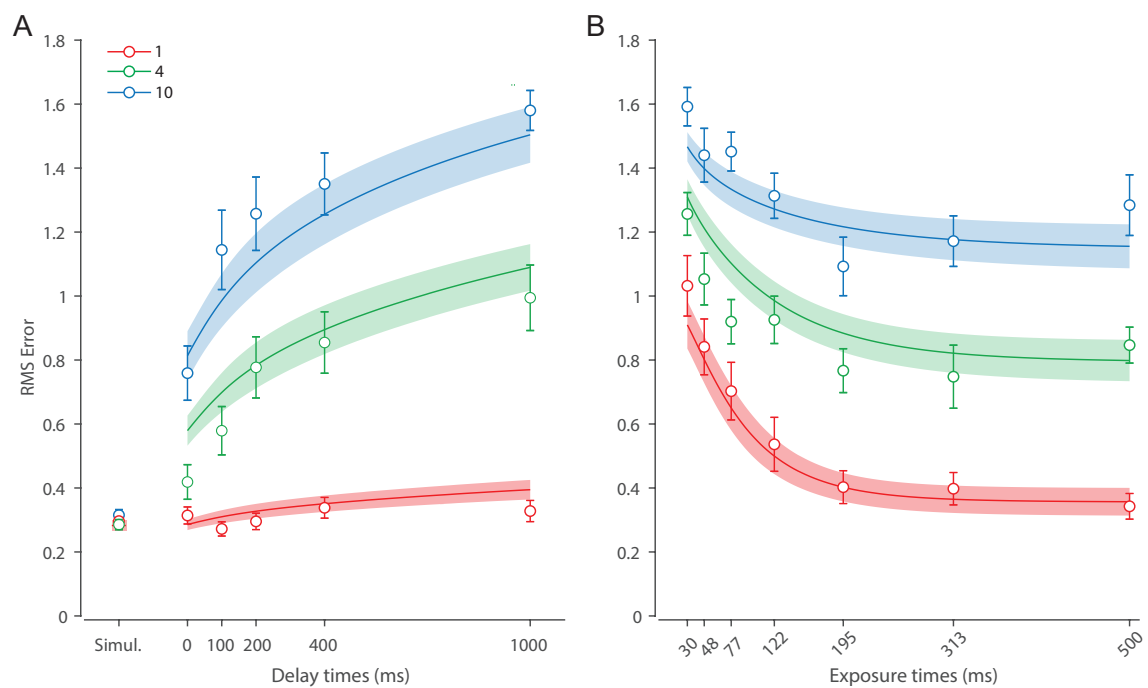

Figure S8: Behavioral data and model fit for a neural model with the direct read-out of information from sensory memory for (A) Experiment 1 and (B) Experiment 2.

## 1131 Additional dataset 1

1132 To further investigate the role of diffusion in memory dynamics, we analysed an additional dataset  
1133 collected in our lab [57]. In this experiment we varied the set size and delay duration similar to  
1134 Experiment 1. In contrast to Experiment 1, we used longer memory delays, which allowed us to  
1135 examine the diffusion mechanism on a more suitable time scale. Moreover, memory delays used in  
1136 this study are out of reach of the decaying sensory information, enabling us to investigate the diffusion  
1137 without changes in the neural signal strength post-cue.

## 1138 Methods

1139 Ten observers (6 females, 4 males, aged 18-34) took part in this experiment. The data for this  
1140 experiment was collected using the same equipment and the testing setting as described for the main  
1141 experiments. A typical trial sequence is illustrated in Fig. S9. Each trial began with the presentation  
1142 of a central annulus which served as a fixation point. Once a stable fixation was achieved, the inner  
1143 annulus radius changed indicating that stimuli would appear in 500 ms. The memory sample array  
1144 was then presented for a duration of 500 ms. The array consisted of one or three randomly oriented  
1145 black bars (length  $2.8^\circ$ ). Each bar was positioned in one of six predetermined locations equally  
1146 distributed around the circle with a radius of  $5^\circ$  around center of the screen. Each bar was presented  
1147 along with a placeholder circle (radius  $1.5^\circ$ ).

1148

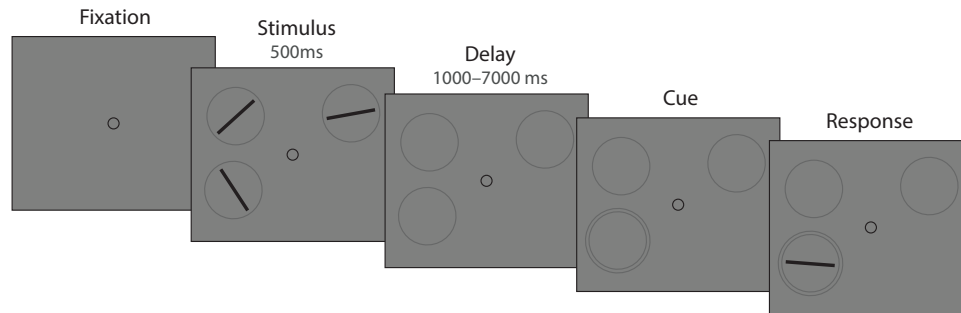

Figure S9: Experimental procedure. Stimuli are not drawn to scale.

1149 Memory array presentation was followed by a memory delay during which fixation circle and  
1150 placeholders stayed visible. The retention interval was either 1 or 7 seconds long. After that, one  
1151 stimulus was randomly cued for recall. The cue consisted of a second, larger circle drawn around one  
1152 of the placeholders. Observers were instructed to start rotating a response dial (Griffin Technology  
1153 PowerMate USB) once they were ready to respond. After the rotation of the response dial was  
1154 detected, a randomly oriented black bar was displayed within the placeholder. Observers were  
1155 instructed to rotate the dial until the displayed bar matched the remembered orientation of the cued  
1156 item. Observers confirmed their response by pressing the dial. Trials with different set sizes and  
1157 delay durations were randomly interleaved.

1158

1159 Eye movements were monitored from the beginning of the trial until stimuli offset, and observers  
1160 were required to hold steady fixation during that period. If the gaze position deviated by more than  
1161  $2^\circ$  a message appeared on the screen and the trial was aborted and restarted with new orientations.  
1162 Each observer completed 700 trials, divided into two sessions and each consisting of 7 equal blocks.  
1163 Two sessions were separated by at least one day, and each lasted approximately 1 hour. At the  
1164 beginning of each session observers familiarized themselves with the task and experimental setup by  
1165 doing at most 50 practice trials.

1166

## 1167 Results

1168 **Behavioral data.** Recall performance is shown in Figure S10. As predicted, response error increased  
1169 with set size and memory delay. A repeated measures ANOVA revealed a significant effect of set  
1170 size ( $F_{(1,9)} = 111.17, p < .001, \eta^2 = .76$ ) and memory interval ( $F_{(1,9)} = 58.14, p < .001, \eta^2 = .12$ ),

1171 and their interaction ( $F_{(1,9)} = 10.66, p = .01, \eta^2 = .02$ ) on response error. Moreover, conducting  
 1172 paired t-tests within each set size revealed recall error increased with the delay with set size 1  
 1173 ( $t_{(9)} = 5.83, p < .001, d = 1.84$ ) and set size 3 ( $t_{(9)} = 5.78, p < .001, d = 1.83$ ). The interaction  
 1174 effect was a consequence of a larger increase in error with delay for set size 3 compared to set size 1  
 1175 ( $\Delta\text{RMSE} = \text{RMSE}_{7000\text{ms}} - \text{RMSE}_{1000\text{ms}}$ ;  $t_{(9)} = 3.27, p = .01, d = 1.03$ ). These results are consistent  
 1176 with Experiment 1, corroborating our finding that increasing the set size and delay time have a  
 1177 disadvantageous effect on memory fidelity.

1178

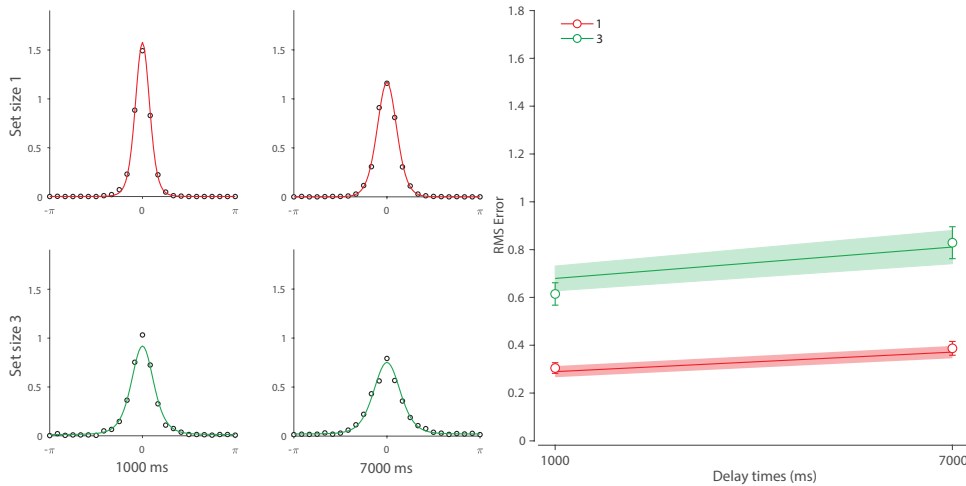

Figure S10: Behavioral data and model fit for Experiment 1a

1179 **Neural model.** We fitted the DyNR model to the data to test whether noise-driven diffusion  
 1180 is sufficient to account for changes in recall fidelity with longer memory intervals. We applied a  
 1181 simplified version of the model without sensory decay and VWM accumulation components. This  
 1182 was justified given that estimate of sensory decay from Experiment 1 was shorter (mean life  $\tau =$   
 1183  $0.21$ ) than the shortest interval used in this experiment (1 s). Moreover, based on our findings in Ex-  
 1184 periment 2, we argue that a display duration of 500 ms is sufficient to fully encode objects into VWM.

1185

1186 Curves in Figure S10 show fits of the model with maximum likelihood (ML) parameters (mean  $\pm$   
 1187 se: population gain  $\gamma = 385.02 \pm 208.3$ , tuning width  $\kappa = 2.67 \pm 0.43$ , cue processing constant  $b =$   
 1188  $0.68 \pm .67$ , base diffusion  $\sigma_{\text{diff}}^2 = 0.009 \pm 0.001$ , swap probability  $p = 0.005 \pm 0.002$ ). The model  
 1189 provided an excellent quantitative fit to response distributions and summary statistics (Fig. S10),  
 1190 successfully explaining the adverse effects of set size and memory interval on recall fidelity. Critically,  
 1191 and consistent with results from Experiment 1, the proposed DyNR model provided a better fit  
 1192 to human response error compared to the matching model without diffusion ( $\Delta\text{AIC} = 144.75$ ) or  
 1193 the model in which diffusion rate increases with set size ( $\Delta\text{AIC} = 42.3$ ). In conclusion, this result  
 1194 shows that variability in representations over longer memory intervals can be fully accounted for by  
 1195 noise-driven accumulation without changes in the representational signal [9, 10, 26].

1196

## 1197 Additional dataset 2

1198 To further validate predictions of the DyNR model we fitted it to an existing working memory study  
1199 (Experiment 1 in 35). This study focused on the role of temporal dynamics during WM encoding,  
1200 thereby addressing the same question as our Experiment 2. In contrast to our Experiment 2, Bays  
1201 et al. [35] used a longer delay period (1100 ms), precluding the strengthening influence of decaying  
1202 sensory information on recall. This dataset therefore isolates the initial information accumulation  
1203 process during stimuli presentation.

## 1204 Methods

1205 The observers ( $N = 32$ ) performed a continuous report task in which a variable number of oriented  
1206 bars was presented for a variable duration, followed by a pattern mask (100 ms) and a 1-second  
1207 delay period after which one of the items was probed for recall. Set size was manipulated between  
1208 observers and exposure duration was manipulated within observers. Each observer performed 100  
1209 trials per exposure duration, for a total of 25600 trials in the study. A more detailed description of  
1210 the experiment is provided in Bays et al. [35].

## 1211 Analysis

1212 Considering only exposure duration in this experiment was manipulated at the observer level, we  
1213 decided to expand our modelling approach by employing a Bayesian hierarchical method as a com-  
1214 promise between fitting the data for each observer (i.e., set size) independently and pooling the data  
1215 across all observers. Using a Bayesian hierarchical modelling, individual-observer parameters are con-  
1216 sidered samples from population distributions, whose means and variances are estimated based on all  
1217 available data. In general, this approach has a desirable characteristic of constraining individual-level  
1218 parameters with the population-level distribution and producing meaningful parameter estimates  
1219 when a model is fitted across separate groups. The dynamic neural model fitted to the data is iden-  
1220 tical to the model fitted in Experiment 2, with the exception that here we assumed any existing  
1221 post-stimulus sensory activity completely diminished by the time of the cue (1100 ms post-stimulus  
1222 offset), and therefore we did not model sensory decay here. To obtain the hierarchical fit, we used the  
1223 Differential Evolution Markov Chain algorithm [100]. All individual-level parameters were samples  
1224 drawn from normal (i.e., Gaussian) distributions, with corresponding mean and standard deviation  
1225 being constrained by uniform hyperprior distributions. We collected 240000 post-warmup samples  
1226 across 12 chains and computed median and 95% equal-tailed intervals (ETI) of posterior distributions  
1227 to obtain the group and individual-level parameter estimates. Prior specifications and empirical data  
1228 for all analyses can be found along with the published code.

## 1229 Results

1230 Figure S11 and Figure S12 show empirical distributions and summary statistics across all conditions.  
1231 Similar to Experiment 2, increasing the exposure duration ( $F_{(7,196)} = 110.9, p < .001, \eta^2 = .188$ ) and  
1232 decreasing the set size ( $F_{(3,28)} = 22.83, p < .001, \eta^2 = .53$ ) had beneficial effect on response error.  
1233 Interaction of exposure duration and set size was significant ( $F_{(21,196)} = 3.13, p < .001, \eta^2 = .02$ ).  
1234 Critically, the pattern of memory fidelity dynamics largely matches the pattern observed in Exper-  
1235 iment 2, with response errors decreasing rapidly as presentation duration was increased from the  
1236 minimum duration, saturating at longer durations. This pattern was consistent across all set sizes,  
1237 which only differed in the absolute error.

1238  
1239 These dynamics were accurately predicted by the DyNR model, both at the level of response  
1240 distributions (curves in Fig. S11) and summary statistics (curves in Fig. S12). The parameters used  
1241 to generate model predictions were obtained by taking the individual observer's posterior medians.  
1242 We observed the following hyperparameters (median and 95% ETI of hyperposterior): population  
1243 gain  $\gamma = 109.47$  (88.1 - 133.57), tuning width  $\kappa = 3.23$  (2.6 - 4.03), sensory rise time constant  $\tau_{\text{rise}}$   
1244  $= 0.0049$  (0.0019 - 0.0091), VWM accumulation time constant  $\tau_{\text{WM}} = 0.067 \pm (0.051 - 0.087)$ , cue  
1245 processing constant  $b = 0.423$  (0.093 - 0.8436), base diffusion  $\sigma_{\text{diff}}^2 = 0.095$  (0.057 - 0.149), spa-  
1246 tial uncertainty time constant  $\tau_{\text{spatial}} = 0.031$  (0.022 - 0.041), swap probability  $p = 0.02$  (0.011 - 0.034).

1247

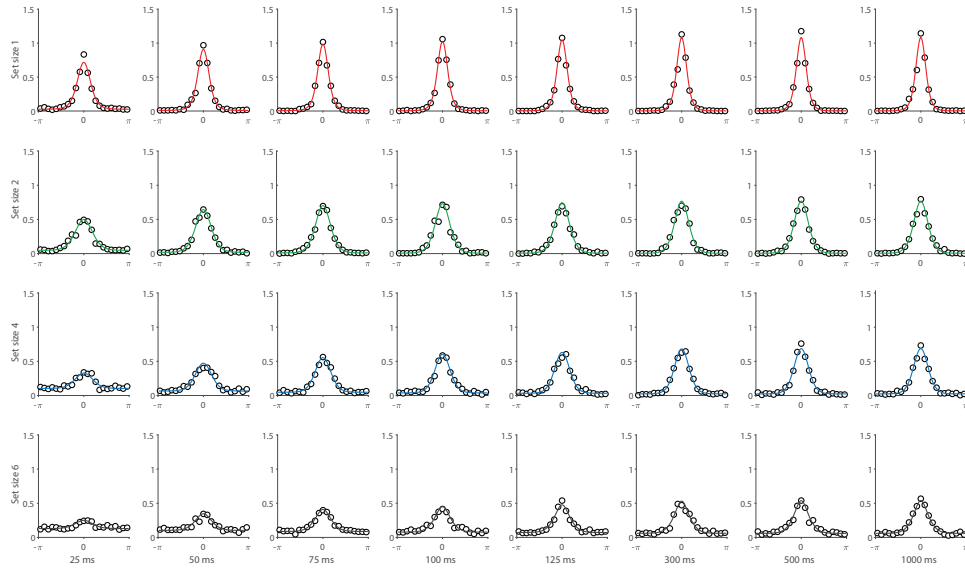

Figure S11: Empirical recall error distributions (black circles) from Experiment 1 in Bays et al. [35] and the DyNR model fits to the data (colored curves).

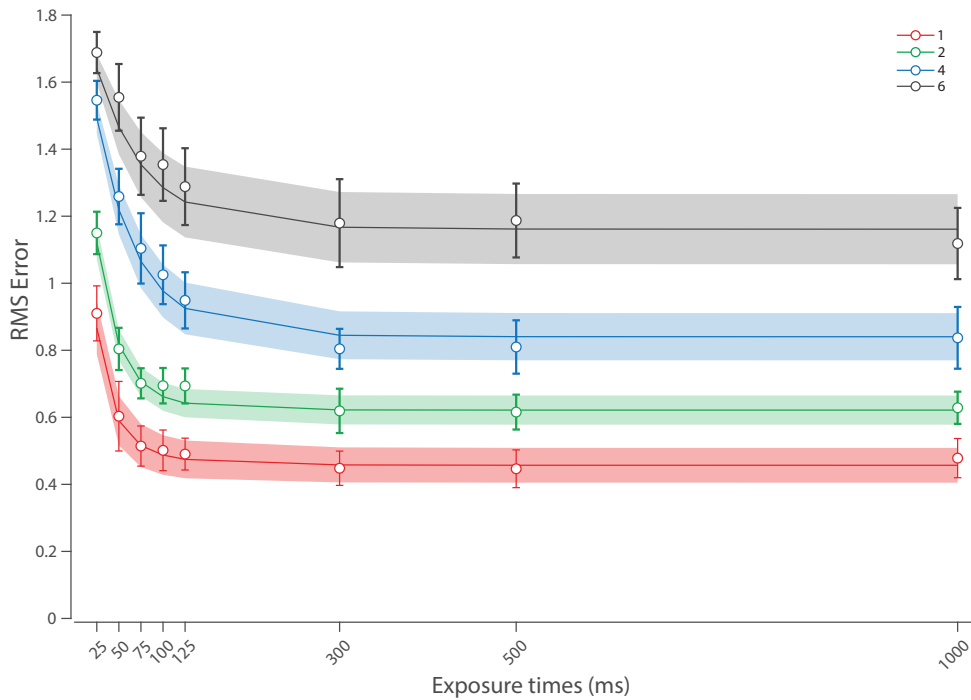

Figure S12: Summary statistics (black circles) from Experiment 1 in Bays et al. [35] and the DyNR model fits to the data (colored curves). The DyNR model was fit to the distributions of recall errors shown in Fig. S11.
